# Supplementary material for: IgBLAST: an immunoglobulin variable domain sequence analysis tool
Source: Oxford University Press journal article supplement (doi:10.1093/nar/gkt382), 2013-05-11
Supplement: gkt382_Supplementary_Data.zip [file gkt382_Supplementary_Data.zip]

>gi|70798435|gb|DQ100924.1| Homo sapiens isolate N1887H immunoglobulin heavy chain variable region (IGHV1-69) mRNA, IGHV1-69\*01 allele, partial cds

CTGGTGCAGTCTGGGGCTGAGGTGAAGAAGCCTGGGTCCTCGGTGAAGGTCTCCTGCAAGGCTTCTGGAGGCA  
CCTTCAG  
CAGCTATGCTATCAGCTGGGTGCGACAGGCCCTGGACAAGGGCTTGAGTGGATGGGAGGGATCATCCCTATC  
TTTGGTA  
CAGCAAACCTACGCACAGAAGTTCCAGGGCAGAGTCACGATTACCGCGGACGAATCCACGAGCACAGCCTACAT  
GGAGCTG  
AGCAGCCTGAGATCTGAGGACACGGCCGTGTATTACTGTGCGGTGGGCCGTGGATATGGCAACCCCGCTACTT  
TTTACTA  
CTACTACTACGGTATGGACGTCTGGGGCCAAGGAACCCCTGGTCAC

>gi|54780327|gb|AY671487.1| Homo sapiens clone 2d464 immunoglobulin mu heavy chain mRNA, partial cds

GTCAGGTGCAGCTACAGCAGTGGGGCGCAGGACTGTTGAAGCCTTCGGAGACCCTGTCCCTCACCTGCGCTGT  
CTATGGT  
GGGTCCTTCAGTGGTTACTACTGGAGCTGGATCCGCCAGCCCCAGGGAAGGGGCTGGAGTGGATTGGGGAAA  
TCAATCA  
TAGTGGAAGCACCAACTACAACCCGTCCCTCAAGAGTCGAGTCACCATATCAGTAGACACGTCCAAGAACCAG  
TTCTCCC  
TGAAGCTGAGCTCTGTGACCGCCGCGGACACGGCTGTGTATTACTGTGCGAGATGGAGGCGTGGCGGACCCGA  
TGCTTTT  
GATATCTGGGGCCAAGGGACAATGGTCACCGTCTCTTCAGGGAGTGCATCCGCCCCAACCCCTTTTCCCCCTCG  
TCTCCTG  
TGAGAATTCCCCGTCTGGGATACG

>gi|270053867|dbj|AB203789.1| Homo sapiens gene for immunoglobulin heavy chain variable region, partial cds, clone: CB11\_III-3E

CAGCTGCAGGAGTCGGGCCCAGGACTGGTGAAGCCTTCGGGGACCCTGTCCCTCACCTGCGCTGTCTCTGGTG  
GCTCCAT  
CAGCAGTAGTAACTGGTGGAGTTGGGTCCGCCAGCCCCAGGGAAGGGGCTGGAGTGGATTGGGGAAATCTAT  
CATAGTG  
GGAGCACCAACTACAACCCGTCCCTCAAGAGTCGAGTCACCATATCAGTAGACAAGTCCAAGAACCAGTTCTC  
CCTGAAG  
CTGAGCTCTGTGACCGCCGCGGACACGGCCGTGTATTACTGTGCGAGAGTAATAACGTATTACGATATTTTGA  
CTGGTTA  
TACGACCCTCAACTGGTTCGACCCCTGGGGCCAGGGAAC

>gi|122892309|gb|EF178067.1| Homo sapiens clone HVK1-6 immunoglobulin heavy chain variable region mRNA, partial cds

ATGGCCCAGGTGCAGCTGGTGCAGTCTGGAGCAGAGGTGAAAAAGCCCGGGGAGTCTCTGAAGATCTCCTGTA  
AGGGTTC  
TGGATACAGCTTTACCAGCTACTGGATCGGCTGGGTGCGCCAGATGCCCGGGAAAGGCCTGGAGTGGATGGGG  
ATCATCT  
ATCCTGGTGA CTCTGATACCAGATACAGCCCGTCCTTCCAAGGCCAGGTCACCATCTCAGCCGACAAGTCCAT  
CAGCACC  
GCCTACCTGCAGTGGAGCAGCCTGAAGGCCTCGGACACCGCCATGTATTACTGTGCGAGAGAGCGCCCCGCCG  
AGCAGTA  
TTACTATGGTTCGGGGAGTTATTATAACCCCTCCCCTTTTGGGTACTGGGGCCAGGGAACCCCTGGTCACCGTC  
TCCTCA

>gi|270053693|dbj|AB203702.1| Homo sapiens gene for immunoglobulin heavy chain variable region, partial cds, clone: CB11\_IV-3B

GTGCAGCTGGTGGAGTCCGGGGGAGGCTTAGTTACAGCTGGGGGTCCCTGAGACTCTCCTGTGCAGCCTCTG  
GATTAC  
CTTCAGTAGCTACTGGATGCACTGGGTCCGCCAAGCTCCAGGGAAGGGGCTGGTGTGGGTCTCACGTATTAAT  
AGTGATG

GGAGTAGCACAAAGCTACGCGGACTCCGTGAAGGGCCGATTACCATCTCCAGAGACAACGCCAAGAACACGCT  
GTATCTG  
CAAATGAACAGTCTGAGAGCCGAGGACACGGCTGTGTATTACTGTGCAAGGGCTTTATATTGTAGTAGTACCA  
GCTGCTA  
TTGTTACTACTACTACTACGGTATGGACGTCTGGGGCCA

>gi|112690850|emb|AM077222.1| Homo sapiens partial IGHV3-23\*01 gene for  
immunoglobulin heavy chain variable region, IGHV3-23\*01 allele, clone  
CE07A15

CGCGTGGCAGTTTCTGACCAGGGTTTCTTTTTGTTTGCAGGTGTCCAGTGTGAGGTGCAGCTGTTGGAGTCTG  
GGGAGG  
CTTGGTACAGCCTGGGGGGTCCCTGAGACTCTCCTGTGCAGCCTCTGGATTACCTTTAGCAGCTATGCCATG  
AGCTGGG  
TCCGCCAGGCTCCAGGGAAGGGGCTGGAGTGGGTCTCAGCTATTAGTGGTAGTGGTGGTAGCACATACTACGC  
AGACTCC  
GTGAAGGGCCGGTTCACCATCTCCAGAGACAATTCCAAGAACACGCTGTATCTGCAAATGAACAGCCTGAGAG  
CCGAGGA  
CACGGCCGTATATTACTGTGCGAAATGGGTGGGGGAGGGTACAGCCCCGATGAATCTGCTCTACTGGGGCCAG  
GGAACCC  
TGGTCACCGTCTCCTCAGGTGAGTCCTCACAACCTCTCTCCTGCTTTAACTCTGAAGGGTTTTGCTGCATTTT  
TGGGG

>gi|112701772|emb|AM082709.1| Homo sapiens partial IGHV3-23\*01 gene for  
immunoglobulin heavy chain variable region, IGHV3-23\*01 allele, clone  
AC01C01

TGGATAAGAGTGAGAGAAACAGTGGATACGTGTGGCAGTTTCTGACCAGGGTTTCTTTTTGTTTGCAGGTGTC  
CAGTGTG  
AGGTGCAGCTGTTGGAGTCTGGGGGAGGCTTGGTACAGCCTGGGGGGTCCCTGAGACTCTCCTGTGCAGCCTC  
TGGATT  
ACCTTTAGCAGCTATGCCATGAGCTGGGTCCGCCAGGCTCCAGGGAAGGGGCTGGAGTGGGTCTCAGCTATTA  
GTGGTAG  
TGGTGGTAGCACATACTACGCAGACTCCGTGAAGGGCCGGTTCACCATCTCCAGAGACAATTCCAAGAACACG  
CTGTATC  
TGCAAATGAACAGCCTGAGAGCCGAGGACACGGCCGTATATTACTGTGCGAAATAACACCAGGCGTTACTATG  
GTTCCGGG  
GAGTTATTAAACCGGGCTACTACTACTACGGTATGGACGTCTGGGGCCAAGGGACCACGGTCACCGTCTCCTC  
AGGTAAG  
AATGGCCACTCTAGGGCCTTTGTT

>gi|402288696|gb|JX432797.1| Homo sapiens isolate MS D04\_VHL1\_N\_4\_2010-  
11-02\_004\_D09 immunoglobulin heavy chain variable region (IGHV) gene,  
partial sequence

CAGGTGCAGCTGGTGCAGTCTGGGGCTGAGGTGAAGAAGCCTGGGGCCTCAGTGAAGGTTTCCTGCAAGGCAT  
CTGGATA  
CACCTTCACCAGCTACTATATGCACTGGGTGCGACAGGCCCCCTGGACAAGGGCTTGAGTGGATGGGAATAATC  
AACCCTA  
GTGGTGGTAGCACAAAGCTACGCACAGAAGTTCCAGGGCAGAGTCACCATGACCAGGGACACGTCCACGAGCAC  
AGTCTAC  
ATGGAGCTGAGCAGCCTGAGATCTGAGGACACGGCCGTGTATTACTGTGCGAGAGAAGGACGGTTACGATATT  
TTGACTG  
GTTAGGAAATACTTTCCCCGTAGGCCCTGACTACTGG

>gi|47846372|emb|AJ579097.1| Homo sapiens partial mRNA for IgM  
immunoglobulin heavy chain variable region (IGHV3-30 gene), clone T1.3.4  
CAGGTGCAGCTGGTGGAGTCTGGGGGAGGCGTGGTCCAGCCTGGGGGGTCCCTGAGACTCTCCTGTGCAGCGT  
CTGGATT  
CACCTTCAGTAGCTATGGCATGCACTGGGTCCGCCAGGCTCCAGGCAAGGGGCTGGAGTGGGTGGCATTATATA  
CGGTATG

ATGGAAGTAATAAATACTATGCAGACTCCGTGAAGGGCCGATTACCATCTCCAGAGACAATTCCAAGAACAC  
GCTGTAT  
CTGCAAATGAACAGCCTGAGAGCTGAGGACACGGCTGTGTATTACTGTGCGAAAGATCCCAGTTACTATGGTT  
CGGGGAC  
AATGGACGTCTGGGGCCAAGGGACCACGGTCACCGTCTCCTCA  
>gi|270053703|dbj|AB203707.1| Homo sapiens gene for immunoglobulin heavy  
chain variable region, partial cds, clone: CB11\_IV-9H  
GATCAGCTGGTGGAGTCTGGGGGAGGCTTGGTACAGCCTGGGGGGTCCCTGAGACCCCTCCTGTGCAGCCTCTG  
GATTCGC  
CTTCAGTAGCTATGTTCTGCACTGGGTTCGCCGGGCTCCAGGGAAGGGTCCGGAGTGGGTATCAGCTATTGGT  
ACTGGTG  
GTGATACATACTATGCAGACTCCGTGATGGGCCGATTACCATCTCCAGAGACAACGCCAAGAAGTCCTTGTA  
TCTTCAA  
ATGAACAGCCTGATAGCTGAGGACATGGCTGTGTATTATTGTGCAAGAGTTGAGGATTCCCGAATTACTATGG  
TTCGGGG  
AGTTATTATAGTGTCTACTACTACTACGGTATGGACGTCTGGGGCCA  
>gi|5051303|emb|AJ245350.1| Homo sapiens mRNA for immunoglobulin gamma  
heavy chain variable region, partial, clone 1A-3GP10  
CAGGTGCAGCTGGTGGAGTCTGGGGGAGGCGTGGTCCAGCCTGGGAGGTCCCTGAGACTCTCCTGTGCAGCCT  
CTGGATT  
CACCTTCAGTAGCTATGGCATGCACTGGGTCCGCCAGGCTCCAGGCAAGGGGCTGGAGTGGGTGGCAGTTATA  
TCATATG  
ATGGAAGTAATAAATACTATGCAGACTCCGTGAAGGGCCGATTACCATCTCCAGAGACAATTCCAAGAACAC  
GCTGTAT  
CTGCAAATGAACAGCCTGAGAGCTGAGGACACGGCTGTGTATTACTGTGCGAAAGATCACGGCAGTGGCTGGC  
AGTACTT  
TGACTACTGGGGCCAGGGAACCCTGGTCACCGTCTCCTCA  
>gi|247424996|gb|FJ488810.1| Homo sapiens isolate ADM-VH3-132  
immunoglobulin heavy chain variable region (IGHV3) gene, partial cds  
GAGGTGCAGCTGTTGGAGTCTGGGGGAGGCTTGGTACAGCCTGGGGGGTCCCTGAGACTCTCCTGTGCAGCCT  
CTGGATT  
CACCTTTAGCAGCTATGCCATGAGCTGGGTCCGCCAGGCTCCAGGGAAGGGGCTGGAGTGGGTCTCAGCTATT  
AGTGGTA  
GTGGTGGTAGCACATACTACGCAGACTCCGTGAAGGGCCGGTTACCATCTCCAGAGACAATTCCAAGAACAC  
GCTGTAT  
CTGCAAATGAACAGCCTGAGAGCCGAGGACACGGCCGTATATTACTGTGCGAAAGTCCCTACGGTGGTAACTC  
AATCTTA  
CTACTTTGACTACTGGGGCCAGGGAACCCTGGTCACCGTCTCCTCAGGGAGT  
>gi|112702131|emb|AM082892.1| Homo sapiens partial IGHV3-23\*01 gene for  
immunoglobulin heavy chain variable region, IGHV3-23\*01 allele, clone  
CF07B14  
TGAGTGTGAATGGATAAGAGTGAGAGAAACAGTGGATACGTGTGGCAGTTTCTGACCAGGGTTTCTTTTTGTT  
TGCAGGT  
GTCCAGTGTGAGGTGCAGCTGTTGGAGTCTGGGGGAGGCTTGGTACAGCCTGGGGGGTCCCTGAGACTCTCCT  
GTGCAGC  
CTCTGGATTACCTTTAGCAGCTATGCCATGAGCTGGGTCCGCCAGGCTCCAGGGAAGGGGCTGGAGTGGGTC  
TCAGCTA  
TTAGTGGTAGTGGTGGTAGCACATACTACGCAGACTCCGTGAAGGGCCGGTTACCATCTCCAGAGACAATTC  
CAAGAAC  
ACGCTGTATCTGCAAATGAACAGCCTGAGAGCCGAGGACACGGCCGTATATTACTGTGCGAAACTCCCCCGGG  
GGTCGTA  
AATTACAATATTGTAGTAGTACCAGCTGCTATGAGCTGAGGTATGGACGTCTGGGGCCAAGGGACCACGGTCA  
CCGTCTC  
CTCAGGTAAGAATGGCCACTCTAGGGCCTTTGTT

>gi|270052842|dbj|AB203238.1| Homo sapiens gene for immunoglobulin heavy chain variable region, partial cds, clone: T18\_III-12A  
CAGGTGCAGCTGCAGGAGTCGGGCCAGGACTGGTGAAGCCTTCACAGACCCTGTCCCTCACCTGCACTGTCTCTGGTGG  
CTCCATCAGCAGTGGTAGTTACTACTGGAGCTGGATCCGGCAGCCCGCCGGAAGGGACTGGAGTGGATTGGGCGTATCT  
ATACCAGTGGGAGCACCAACTACAACCCCTCCCTCAAGAGTCGAGTCACCATATCAGTAGACACGTCCAAGAACAGTTC  
TCCCTGAAGCTGAGCTCTGTGACCGCCGAGACACGGCCGTGTATTACTGTGCGAGATCAAGGGAATATCAGTATTACTA  
TGATAGTAGTGGTTACCTAAAGGGGGCTTCTACTTTGACTACTGGGGCCAGGGAAC  
>gi|402288331|gb|JX432432.1| Homo sapiens isolate MS VH1\_K2b\_6\_2010-09-10\_001\_E05 immunoglobulin heavy chain variable region (IGHV) gene, partial sequence  
CAGGTTTCAGCTGGTGCAGTCTGGAGCTGAGGTGAAGAAGCCTGGGGCCTCAGTGAAGGTCTCCTGCAAGGCTTCTGGTTA  
CACCTTTACCAGCTATGGTATCAGCTGGGTGCGACAGGCCCTGGACAAGGGCTTGAGTGGATGGGATGGATCAGCGCTT  
ACAATGGTAACACAACTATGCACAGAAGCTCCAGGGCAGAGTCACCATGACCACAGACACATCCACGAGCACAGCCTAC  
ATGGAGCTGAGGAGCCTGAGATCTGACGACACGGCCGTGTATTACTGTGCGAGAGATAGTATATGGTTCGGGGAGTCCCA  
CGCGCGTTACTACTACTACGGTATGGACGTCTGG  
>gi|47846508|emb|AJ579165.1| Homo sapiens partial mRNA for IgM immunoglobulin heavy chain variable region (IGHV4-34 gene), clone T2.4.30  
CAGGTGCAGCTACAGCAGTGGGGCGCAGGACTGTTGAAGCCTTCGAGACCCTGTCCCTCACCTGCGCTGTCTATGGTGG  
GTCCTTCAGTGGTTACTACTGGAGCTGGATCCGCCAGCCCCAGGGAAGGGGCTGGAGTGGATTGGGGAAATCAATCATA  
GTGGAAGCACCAACTACAACCCGTCCCTCAAGAGTCGAGTCACCATATCAGTAGACACGTCCAAGAACCAGTCTCCCTG  
AAGCTGAGCTCTGTGACCGCCGCGGACACGGCTGTGTATTACTGTGCGACCGGCGGGCCCGATATTTTGACTGTCGTAG  
CTGGTTCGACCCCTGGGGCCAGGGAACCCTGGTCACCGTCTCCTCA  
>gi|46254320|gb|AY393196.1| Homo sapiens clone RA702-M5-23.fa immunoglobulin heavy chain mRNA, partial cds  
CTCCTCCTGGCTGTTCTCCAAGGAGTCTGTGCCGAGGTGCAGCTGGTGCAGTCTGGAGCAGAGGTGAAAAAGCCGGGGGA  
GTCTCTGAAGATCTCCTGTAAGGGTTCTGGATACAGCTTTACCAGCTACTGGATCGGCTGGGTGCGCCAGATGCCGGGA  
AAGGCCTGGAGTGGATGGGGATCATCTATCCTGGTGACTCTGATACCAGATACAGCCCGTCCTTCCAAGGCCAGGTCACC  
ATCTCAGCCGACAAGTCCATCAGCACCGCCTACCTGCAGTGGAGCAGCCTGAAGGCCTCGGACACCGCCATGTATTACTG  
TGCGAGACACCTCCGCGGGTATAACTGGAACGACTTTGACTACTGGGGCCAGGGAACCCTGGTCACCGTCTCCTCAGGGA  
GTGCATCCGCCCCAACCCCTTTTCCCCCTCGTCTCCTGTGAGAATTCCCCGTGCGATACGAGCAGCGTGGCCGTGGCTGC  
CTCGCACAGGACTTCCTT  
>gi|112692157|emb|AM077876.1| Homo sapiens partial IGHV3-23\*01 gene for immunoglobulin heavy chain variable region, IGHV3-23\*01 allele, clone CE03A09  
TGAGTGTGAATGGATAAGAGTGAGAGAAACAGTGGATACGTGTGGCAGTTTCTGACCAGGGTTTCTTTTTTGTGTGCAGGT

GTCCAGTGTGAGGTGCAGCTGTTGGAGTCTGGGGGAGGCTTGGTACAGCCTGGGGGGTCCCTGAGACTCTCCT  
GTGCAGC  
CTCTGGATTACCTTTAGCAGCTATGCCATGAGCTGGGTCCGCCAGGCTCCAGGGAAGGGGCTGGAGTGGGTC  
TCAGCTA  
TTAGTGGTAGTGGTGGTAGCACATACTACGCAGACTCCGTGAAGGGCCGGTTCACCATCTCCAGAGACAATTC  
CAAGAAC  
ACGCTGTATCTGCAAATGAACAGCCTGAGAGCCGAGGACACGGCCGTATATTACTGTGCGAAAGAAAACCTTC  
CGATTTG  
GAGTGGTTATTTCGGAATACTACTACTACGGTATGGACGTCTGGGGCCAAGGGACCACGGTCACCGTCTCCTCA  
GGTAAGA  
ATGGCCACTCTAGGGCCTTTGTT  
>gi|54780273|gb|AY671459.1| Homo sapiens clone 1d420 immunoglobulin mu  
heavy chain mRNA, partial cds  
CAGGTGCAGCTGCAGGAGTCGGGCCCAGGACTGGTGAAGCCTTCGGAGACCCTGTCCCTCACCTGCACTGTCT  
CTGGTGG  
CTCCATCAGTAGTTACTACTGGAGCTGGATCCGGCAGCCCCAGGGAAGGGACTGGAGTGGATTGGGTATATC  
TATTACA  
GTGGGAGCACCAACTACAACCCCTCCCTCAAGAGTCGAGTCACCATATCAGTAGACACGTCCAAGAACCAGTT  
CTCCCTG  
AAGCTGAGCTCTGTGACCGCTGCGGACACGGCCGTGTATTACTGTGCGAGATCGGAGTACGGCAGCTGGTACG  
ACTACTG  
GGGCCAGGGAACCCTGGTCACCGTCTCCTCAG  
>gi|5834019|gb|AF174030.1|AF174030 Homo sapiens clone 77u-c17  
immunoglobulin heavy chain variable region precursor (IgH) mRNA, partial  
cds  
ATGGAATTGGGGCTGAGCTGGGTTTTCTTTGTTGCTATTTTAGAAGGTGTCCAGTGTGAGGTGCAGCTGGTGG  
AGTCTGG  
GGGAGGCTTGGTCCAGCCTGGGGGGTCCCTGAGACTCTCCTGTGCAGCCTCTGGATTACCTTTAGTAGCTAT  
TGGATGA  
GCTGGGTCCGCCAGGCTCCAGGGAAGGGGCTGGAGTGGGTGGCCAACATAAAGCAAGATGGAAGTGAGAAATA  
CTATGTG  
GACTCTGTGAAGGGCCGATTCACCATCTCCAGAGACAACGCCAAGAACTCACTGTATCTGCAAATGAACAGCC  
TGAGAGC  
CGAGGACACGGCTGTGTATTACTGTGCGAGAGATGGGGATATCGGTGACTGGTGGTTCGACCCCTGGGGCCAG  
GGAACCC  
TGGTCACCGTCTCCTCAGGG  
>gi|5834215|gb|AF174128.1|AF174128 Homo sapiens clone sc77u-56  
immunoglobulin heavy chain variable region (IgH) mRNA, partial cds  
CAGGTGCAGCTGCAGGAGTCGGGCCCAGGACTGGTGAAGCCTTCACAGACCCTGTCCCTCACCTGCACTGTCT  
CTGGTGG  
CTCCATCAGCAGTGGTGGTTACTACTGGAGCTGGATCCGCCAGCACCCAGGGAAGGGCCTGGAGTGGATTGGG  
TACATCT  
ATTACAGTGGGAGCACCTACTACAACCCGTCCCTCAAGAGTCGAGTTACCATATCAGTAGACACGTCTAAGAA  
CCAGTTC  
TCCCTGAAGCTGAGCTCTGTGACTGCCGCGGACACGGCCGTGTATTACTGTGCGAGAGTAAATCCCACCGGGG  
ACTACTA  
CTACGGTATGGACGTCTGGGGCCAAGGGACCACGGACCCCGTATCC  
>gi|15886959|emb|AJ414009.1| Homo sapiens partial mRNA for immunoglobulin  
heavy chain variable region (IGVH gene), isolate CLL023  
CAGGTGCAGCTGGTGCAGTCTGGGGCTGAGGTGAAGAAGCCTGGGTCTCGGTGAAGGTCTCCTGCAAGGCTT  
CTGGAGG  
CACCTTCAGCAGCTATGCTATCAGCTGGGTGCGACAGGCCCTGGACAAGGGCTTGAGTGGATGGGAGGGATC  
ATCCCTA

TCTTTGGTACAGCAAACACTACGCACAGAAGTTCCAGGGCAGAGTCACGATTACCGCGGACAAATCCACGAGCAC  
AGCCTAC  
ATGGAGCTGAGCAGCCTGAGATCTGAGGACACGGCCGTGTATTACTGTGCGAGAGCGTGGAAGGCTCCTGATT  
ACGATTT  
TTGGAGTGGTTATTATACCGGTATTCTCTGGTTTCGACCCCTGGGGCCAAGGAACCCTGGT

>gi|112692329|emb|AM077962.1| Homo sapiens partial IGHV3-23\*01 gene for  
immunoglobulin heavy chain variable region, IGHV3-23\*01 allele, clone  
BU04A28  
TGAGTGTGAATGGATAAGAGTGAGAGAAACAGTGGATACGTGTGGCAGTTTCTGACCAGGGTTTCTTTTTTGT  
TGCAGGT  
GTCCAGTGTGAGGTGCAGCTGTTGGAGTCTGGGGGAGGCTTGGTACAGCCTGGGGGGTCCCTGAGACTCTCCT  
GTGCAGC  
CTCTGGATTACCTTTAGCAGCTATGCCATGAGCTGGGTCCGCCAGGCTCCAGGGAAGGGGCTGGAGTGGGTC  
TCAGCTA  
TTAGTGGTAGTGGTGGTAGCACATACTACGCAGACTCCGTGAAGGGCCGGTTCACCATCTCCAGAGACAATTC  
CAAGAAC  
ACGCTGTATCTGCAAATGAACAGCCTGAGAGCCGAGGACACGGCCGTATATTACTGTGCGAAAGATTCCCACA  
CAAGTTA  
TAGCAGCAGCTGGTACGCCTGGGGCTACTACTACGGTATGGACGTCTGGGGCCAAGGGACCACGGTCACCGTC  
TCCTCAG  
GTAAGAATGGCCACTCTAGGGCCTTTGTT

>gi|3171060|gb|AF062294.1|AF062294 Homo sapiens clone 48sc-27  
immunoglobulin heavy chain variable region (IGH) mRNA, partial cds  
GTGCAGCTGGTGGAGTCTGGGGGAGGCTTGGTCAAGCCTGGAGGGTCCCTGAGACTCTCCTGTGCAGCCTCTG  
GATTAC  
CTTCAGTGACTACTACATGAGCTGGATCCGCCAGGCTCCAGGGAAGGGGCTGGAGTGGGTTTCATACATTAGT  
AGTAGTG  
GTAGTACCATATACTACGCAGACTCTGTGAAGGGCCGATTACCATCTCCAGGGACAACGCCAAGAACTCACT  
GTATCTG  
CAAATGAACAGCCTGAGAGCCGAGGACACGGCCGTGTATTACTGTGCGAGAGGGGTGGGATATTGTAGTGGTG  
GTAGCTG  
CCAAAACCTGGTTTCGACCCCTGGGGCCAGGGAACCCTGGTCACCGTCTCCTCAGGG

>gi|112693473|emb|AM078535.1| Homo sapiens partial IGHV3-23\*01 gene for  
immunoglobulin heavy chain variable region, IGHV3-23\*01 allele, clone  
AG14A21  
GGATACGTGTGGCAGTTTCTGACCAGGGTTTCTTTTTGTTTGCAGGTGTCCAGTGTGAGGTGCAGCTGTTGGA  
GTCTGGG  
GGAGGCTTGGTACAGCCTGGGGGGTCCCTGAGACTCTCCTGTGCAGCCTCTGGATTACCTTTAGCAGCTATG  
CCATGAG  
CTGGGTCCGCCAGGCTCCAGGGAAGGGGCTGGAGTGGGTCTCAGCTATTAGTGGTAGTGGTGGTAGCACATAC  
TACGCAG  
ACTCCGTGAAGGGCCGGTTCACCATCTCCAGAGACAATTCCAAGAACACGCTGTATCTGCAAATGAACAGCCT  
GAGAGCC  
GAGGACACGGCCGTATATTACTGTGCGAAAGATCGAATAGGGTTTGC GGACCGACTCACTTCCTACTACTACG  
GTATGGA  
CGTCTGGGGCCAAGGGACCACGGTCACCGTCTCCTCAGGTAAGAATGGCCACTCTAGGGCCTTTGTT  
>gi|18092601|gb|AF455551.1|AF455551 Homo sapiens clone RIZMVH7 anti-  
cardiolipin immunoglobulin heavy chain mRNA, partial cds  
CAGATCACCTTGAAGGAGTCTGGTCCTACGCTGGTGAAACCCACACAGACCCTCACGCTGACCTGCACCTTCT  
CTGGGTT  
CTCACTCAGCACTAGTGGAGTGGGTGTGGGCTGGATCCGTCAGCCCCCAGGAAAGGCCCTGGAGTGGCTTGCA  
CTCATTT

ATTGGAATGATGATAAGCGCTACAGCCCATCTCTGAAGAGCAGGCTCACCATCACCAAGGACACCTCCAAAA  
CCAGGTG  
GTCCTTACAATGACCAACATGGACCCTGTGGACACAGCCACATATTACTGTGCACACAGACCTGCAAATTACG  
ATTTTTG  
GAGTGGTTATTATACCGGTAGTGGCTGGTTTACGCCCCTGGGGCCAGGGAACCCTGGTCACCGTCTCCTCA  
>gi|237702013|gb|FJ385358.1| Homo sapiens isolate RSV240H immunoglobulin  
heavy chain variable region mRNA, partial cds  
GGGAGGCTTGGTACAGCCTGGGGGTCCCTGAGACTCTCCTGTGCAGCCTCTGGATTACCTTTAGCAGCTAT  
GCCATGA  
GCTGGGTCCGCCAGGCTCCAGGGAAGGGGCTGGAGTGGTCTCAGCTATTAGTGGTAGTGGTGGTAGCACATA  
CTACGCA  
GACTCCGTGAAGGGCCGGTTCACCATCTCCAGAGACAATTCCAAGAACACGCTGTATCTGCAAATGAACAGCC  
TGAGAGC  
CGAGGACACGGCCGTATATTACTGTGCGAAATCCCGATCTGCCGATCGCGCTAGATTACGATATTTTACTGG  
TTATCGC  
CTCCTTTTACTACTGGGGCCAGGGAACCCTGGTCACCGTCTCCTCA  
>gi|54780697|gb|AY671685.1| Homo sapiens clone 5fb62 immunoglobulin mu  
heavy chain mRNA, partial cds  
CAGGTGCAGCTACAGCAGTGGGGCGCAGGACTGTTGAAGCCTTCGGAGACCCTGTCCCTCACCTGCGCTGTCT  
ATGGTGG  
GTCCTTCAGTGGTTACTACTGGAGCTGGATCCGCCAGCCCCAGGGAAGGGGCTGGAGTGGATTGGGGAAATC  
AATCATA  
GTGGAAGCACCAACTACAACCCGTCCCTCAAGAGTCGAGTCACCATATCAGTAGACACGTCCAAGAACCAGTT  
CTCCCTG  
AAGCTGAGCTCTGTGACCGCCGCGACACGGCTGTGTATTACTGTGCGAGAGGCGATTGTAGTAGTACCAGCT  
GCTATAT  
CTTTGACTACTGGGGCCAGGGAACCCTGGTCACCGTCTCCTCAG  
>gi|112690631|emb|AM077112.1| Homo sapiens partial IGHV3-23\*01 gene for  
immunoglobulin heavy chain variable region, IGHV3-23\*01 allele, clone  
CD07B08  
TGAGTGTGAATGGATAAGAGTGAGAGAAACAGTGGATACGTGTGGCAGTTTCTGACCAGGGTTTCTTTTTTGT  
TGCAGGT  
GTCCAGTGTGAGGTGCAGCTGTTGGAGTCTGGGGGAGGCTTGGTACAGCCTGGGGGGTCCCTGAGACTCTCCT  
GTGCAGC  
CTCTGGATTACCTTTAGCAGCTATGCCATGAGCTGGGTCCGCCAGGCTCCAGGGAAGGGGCTGGAGTGGGTC  
TCAGCTA  
TTAGTGGTAGTGGTGGTAGCACATACTACGCAGACTCCGTGAAGGGCCGGTTCACCATCTCCAGAGACAATTC  
CAAGAAC  
ACGCTGTATCTGCAAATGAACAGCCTGAGAGCCGAGGACACGGCCGTATATTACTGTGCGAAAAACATGGCCC  
AATACCA  
GCTCGCTATCCCTGCTTTTGATATCTGGGGCCAAGGGACAATGGTCACCGTCTCTTCAGGTAAGATGGCTTTC  
CTTCTGC  
CTCCTTTCTCTGGGGCCAGCGTCCTCTGTCC  
>gi|112692720|emb|AM078158.1| Homo sapiens partial IGHV3-23\*01 gene for  
immunoglobulin heavy chain variable region, IGHV3-23\*01 allele, clone  
AQ02B27  
GCAGGTGTCCAGTGTGAGGTGCAGCTGTTGGAGTCTGGGGGAGGCTTGGTACAGCCTGGGGGGTCCCTGAGAC  
TCTCCTG  
TGCAGCCTCTGGATTACCTTTAGCAGCTATGCCATGAGCTGGGTCCGCCAGGCTCCAGGGAAGGGGCTGGAG  
TGGGTCT  
CAGCTATTAGTGGTAGTGGTGGTAGCACATACTACGCAGACTCCGTGAAGGGCCGGTTCACCATCTCCAGAGA  
CAATTCC  
AAGAACACGCTGTATCTGCAAATGAACAGCCTGAGAGCCGAGGACACGGCCGTATATTACTGTGCGAAAGACC  
TCATGTA

TAGCAGCAGCTGGTACGACTACTACTACGGTATGGACGTCTGGGGCCAAGGGACCACGGTCACCGTCTCCTCA  
GGTAAGA  
ATGGCCACTCTAGGGCCTTTGTT  
>gi|270054451|dbj|AB204107.1| Homo sapiens gene for immunoglobulin heavy  
chain variable region, partial cds, clone: CB11\_VII-11A  
GTAAGGGGCTCCCCAGTCACTGGGCTGAGGGAGAAACCAGCACAGTCAAGTGAGACTTCATGCACTCCCATCT  
CCTCTCC  
ACAGGTGCCCCTCCAGGTGCAGCTGGTGCAATCTGGGTCTGAGTTGAAGAAGCCTGGGGCCTCAGTGAAGG  
TTTCCTG  
CAAGGCTTCTGGATACACCTTCACTAGCTATGCTATGAATTGGGTGCGACAGGCCCCCTGGACAAGGGCTTGAG  
TGGATGG  
GATGGATCAACACCAACACTGGGAACCCAACGTATGCCAGGGCTTCACAGGACGGTTTGTCTTCTCCTTGGA  
CACCTCT  
GTCAGCACGGCATATCTGCAGATCTGCAGCCTAAAGGCTGAGGACACTGCCGTGTATTACTGTGCGAGAGATC  
CCTCTTC  
CTTCCAGGGTACCAGCTGGCAAGGTGGTGACGGTATTGACTACTGGGGCCAGGGAAC  
>gi|402288163|gb|JX432264.1| Homo sapiens isolate JJ VH1\_N1a\_4\_2010-09-  
06\_004\_H05 immunoglobulin heavy chain variable region (IGHV) gene,  
partial sequence  
CAGGTCCAGCTGGTGCAGTCTGGGGCTGAGGTGAAGAAGCCTGGGTCTCGGTGAAGGTCTCCTGCAAGGCTT  
CTGGAGG  
CACCTTCAGCAGCTATGCTATCAGCTGGGTGCGACAGGCCCCCTGGACAAGGGCTTGAGTGGATGGGAAGGATC  
ATCCCTA  
TCCTTGGTATAGCAAACCTACGCACAGAAGTTCCAGGGCAGAGTCACGATTACCGCGGACAAATCCACGAGCAC  
AGCCTAC  
ATGGAGCTGAGCAGCCTGAGATCTGAGGACACGGCCGTGTATTACTGTGCGAGAGCCGAGATGAAATATTGTG  
GTGGTGA  
CTGCTATTCCGCTACTTCCGGACGCTACTACTACTACGGTATGGACGTCTGG  
>gi|602000|emb|Z46322.1| H.sapiens immunoglobulin heavy chain VDJ region  
(SEBV B13)  
CTACAGCAGTGGGGCGCAGGACTGTTGAAGCCTTCGGAGACCCTGTCCCTCACCTGCGCTGTCTATGGTGGGT  
CCTTCAG  
TGGTTACTACTGGAGCTGGATCCGCCAGCCCCAGGGAAGGGGCTGGAGTGGATTGGGGAAATCAATCATAGT  
GGAAGCA  
CCAACACAACCCGTCCCTCAAGAGTCGAGTCACCATATCAGTAGACACGTCCAAGAACCAGTTCTCCCTGAA  
GCTGAGC  
TCTGTGACCGCCGCGGACACGGCTGTGTATTACTGTGCGAGAGAGCGAATTATGATTACATTTGGGGGAGTTA  
TCGTTAT  
CGACGTACCCTCCGACTACTGGGGCCAGGGAACCCTGGTCACCGTCTCCTCA  
>gi|3170802|gb|AF062170.1|AF062170 Homo sapiens clone 45u-45  
immunoglobulin heavy chain variable region (IGH) mRNA, partial cds  
ATGGACTGGACCTGGAGGATCCTCTTCTTGGTGGCAGCAGCAACAGGTGCCCCACTCCCAGGTGCAGCTGGTGC  
AATCTGG  
GTCTGAGTTGAAGAAGCCTGGGGCCTCAGTGAAGGTTTCTGCAAGGCTTCTGGATACACCTTCACTAGCTAT  
GCTATGA  
ATTGGGTGCGACAGGCCCCCTGGACAAGGGCTTGAGTGGATGGGATGGATCAACACCAACACTGGGAACCCAAC  
GTATGCC  
CAGGGCTTCACAGGACGGTTTGTCTTCTCCTTGACACCTCTGTCAGCACGGCATATCTGCAGATCAGCAGCC  
TAAAGGC  
TGAGGACACTGCCGTGTATTACTGTGCGAGAGACGTGGCTACGATCGATGAAAACCTGGTTCGACCCCTGGGGC  
CAGGGAA  
CCCTGGTCACCGTCTCCTCAGGG



>gi|112690719|emb|AM077156.1| Homo sapiens partial IGHV3-23\*01 gene for immunoglobulin heavy chain variable region, IGHV3-23\*01 allele, clone BV05A07  
TGAGTGTGAATGGATAAGAGTGAGAGAAACAGTGGATACGTGTGGCAGTTTCTGACCAGGGTTTCTTTTTTGT  
TGCAGGT  
GTCCAGTGTGAGGTGCAGCTGTTGGAGTCTGGGGGAGGCTTGGTACAGCCTGGGGGGTCCCTGAGACTCTCCT  
GTGCAGC  
CTCTGGATTACCTTTAGCAGCTATGCCATGAGCTGGGTCCGCCAGGCTCCAGGGAAGGGGCTGGAGTGGGTC  
TCAGCTA  
TTAGTGGTAGTGGTGGTAGCACATACTACGCAGACTCCGTGAAGGGCCGGTTCACCATCTCCAGAGACAATTC  
CAAGAAC  
ACGCTGTATCTGCAAATGAACAGCCTGAGAGCCGAGGACACGGCCGTATATTACTGTGCGAAAGATCCGCCCC  
GCGGGAC  
AGGAGCTACAACAACTACTGGGGCCAGGGAACCCTGGTCACCGTCTCCTCAGGTGAGTCCTCACAACCTCTC  
TCCTGCT  
TTAACTCTGAAGGGTTTTGCTGCATTTTTGGGG  
>gi|84797993|gb|DQ322824.1| Homo sapiens immunoglobulin heavy chain variable region EM5-4-PPS-VH3-10 mRNA, partial cds  
CCCTTGGTGCAGCTGGTGGAGTCTGGGGGAGGCGTGGTCCAGCCTGGGAGGTCCCTGAGACTCTCCTGTGCAG  
CGTCTGG  
ATTCACCTTCAGTAGCTATGGCATGCACTGGGTCCGCCAGGCTCCAGGCAAGGGGCTGGAGTGGGTGGCAGTT  
ATATGGT  
ATGATGGAAGTAATAAATACTATGCAGACTCCGTGAAGGGCCGATTACCATCTCCAGAGACAATTCGAAGAA  
CACGCTG  
TATCTGCAAATGAACAGCCTGAGAGCCGAGGACACGGCTGTGTATTACTGTGCGAGAGAGGGGGCTCGTTTAT  
GCTTTGA  
CTACTGGGGCCAGGGAACCCTGGTCACCGTCTCCTCAGAAGGGCG  
>gi|112693495|emb|AM078546.1| Homo sapiens partial IGHV3-23\*01 gene for immunoglobulin heavy chain variable region, IGHV3-23\*01 allele, clone BU05A27  
GTGTGAATGGATAAGAGTGAGAGAAACAGTGGATACGTGTGGCAGTTTCTGACCAGGGTTTCTTTTTGTTTGC  
AGGTGTC  
CAGTGTGAGGTGCAGCTGTTGGAGTCTGGGGGAGGCTTGGTACAGCCTGGGGGGTCCCTGAGACTCTCCTGTG  
CAGCCTC  
TGGATTACCTTTAGCAGCTATGCCATGAGCTGGGTCCGCCAGGCTCCAGGGAAGGGGCTGGAGTGGGTCTCA  
GCTATTA  
GTGGTAGTGGTGGTAGCACATACTACGCAGACTCCGTGAAGGGCCGGTTCACCATCTCCAGAGACAATTCGA  
GAACACG  
CTGTATCTGCAAATGAACAGCCTGAGAGCCGAGGACACGGCCGTATATTACTGTGCGAAACCTACGGTGGTAA  
CTCCGAG  
GGACTACTACTACTACGGTATGGACGTCTGGGGCCAAGGGACCACGGTCACCGTCTCCTCAGGTAAGAATGGC  
CACTCTA  
GGGCCTTTGTT  
>gi|32648|emb|X63081.1| H.sapiens mRNA for fetal IG heavy chain (FL13-45)  
CAGGTGCAGCTGGTGGAGTCTGGGGGAGGCTTGGTCAAGCCTGGAGGGTCCCTGAGACTCTCCTGTGCAGCCT  
CTGGATT  
CACCTTCAGTGACTACTACATGAGCTGGATCCGCCAGGCTCCAGGGAAGGGGCTGGAGTGGGTTTCATACATT  
AGTAGTA  
GTGGTAGTACCATATACTACGCAGACTCTGTGAAGGGCCGATTACCATCTCCAGGGACAACGCCAAGAAGTC  
ACTGTAT  
CTGCAAATGAACAGCCTGAGAGCCGAGGACACGGCCGTGTATTACTGTGCGGGCCAACCTGGGGGATGATGCTT  
TTGATAT  
CTGGGGCCAAGGGACAATGGTCACCGTCTCTTCA

>gi|5834095|gb|AF174068.1|AF174068 Homo sapiens clone sc48u-74  
immunoglobulin heavy chain variable region (IgH) mRNA, partial cds  
GAGGTGCAGCTGGTGCAGTCTGGAGCAGAGGTGAAAAAGCCCGGGAGTCTCTGAAGATCTCCTGTAAGGGTT  
CTGGATA  
CAGCTTTACCAGCTACTGGATCGGCTGGGTGCGCCAGATGCCCGGAAAGGCCTGGAGTGGATGGGGATCATC  
TATCCTG  
GTGACTCTGATACCAGATACAGCCCGTCCTTCCAAGGCCAGGTACCATCTCAGCCGACAAGTCCATCAGCAC  
CGCCTAC  
CTGCAGTGGAGCAGCCTGAAGGCCTCGGACACCGCCATGTATTACTGTGCGAGATCGAGTGACACAAAGGGGG  
CATACTA  
CTACTACTACGGTATGGACGTCTGGGGCCAAGGGACCACGGTCACCGTGTCTCCTCAGGG  
>gi|112692181|emb|AM077888.1| Homo sapiens partial IGHV3-23\*01 gene for  
immunoglobulin heavy chain variable region, IGHV3-23\*01 allele, clone  
BV03A62  
CAGTTTCTGACCAGGGTTTCTTTTTGTTTGCAGGTGTCCAGTGTGAGGTGCAGCTGTTGGAGTCTGGGGGAGG  
CTTGGA  
CAGCCTGGGGGGTCCCTGAGACTCTCCTGTGCAGCCTCTGGATTACCTTTAGCAGCTATGCCATGAGCTGGG  
TCCGCCA  
GGCTCCAGGGAAGGGGCTGGAGTGGGTCTCAGCTATTAGTGGTAGTGGTGGTAGCACATACTACGCAGACTCC  
GTGAAGG  
GCCGGTTCACCATCTCCAGAGACAATTCCAAGAACACGCTGTATCTGCAAATGAACAGCCTGAGAGCCGAGGA  
CACGGCC  
GTATATTACTGTGCGAAAGATTTAAGCGACACGCCCCCGATCGTAGGTGGCACACCGCCTACTACTACTACG  
GTATGGA  
CGTCTGGGGCCAAGGGACCACGGTCACCGTCTCCTCAGGTAAGAATGGCCACTCTAGGGCCTTTGTT  
>gi|304435953|gb|HM474416.1| Homo sapiens clone IGH rearrangement case 8  
genomic sequence  
TATTACATGAAAAACATCTGTGGTTCTTCCTCCTGCTGGTGGCGGCTCCCAGATGTGAGTGTCTTAGGATGC  
AGACATG  
GAGATATGGGAGGCTGCCTCTGATCCCAGGGCTCACTGTGGGTTTTTCTGTTTCACAGGGGTCCTGTCCCAGCT  
GCAGCTG  
CAGGAGTCGGGCCCAGGACTGGTGAAGCCTTCGGAGACCCTGTCCCTCACCTGCACTGTCTCTGGTGGCTCCA  
TCAGCAG  
TAGTAGTTACTACTGGGGCTGGATCCGCCAGCCCCCAGGGAAGGGGCTGGAGTGGATTGGGAGTATCTATTAT  
AGTGGGA  
GCACCTACTACAACCCGTCCCTCAAGAGTCGAGTCACCATATCAGTAGACACGTCCAAGAACCAGTTCTCCCT  
GAAGCTG  
AGCTCTGTGACCGCCGCGGACACGGCCGTGTATTACTGTGCGAGAGTCTACGGGTATAGCAGCAGCTGGTGGG  
GGGAGA  
AAACTGGTTCGACCCCTGGGGCCAGGGA  
>gi|270053561|dbj|AB203636.1| Homo sapiens gene for immunoglobulin heavy  
chain variable region, partial cds, clone: CB11\_I-1H  
CACAGGTAAGAGGCTCCCTAGTCCCAGTGATGAGAAAGAGATTGAGTCCAGTCCAGGGAGATCTCATCCACTT  
CTGTGTT  
CTCTCCACAGGAGCCCACTCCCAGGTGCAGCTGGTGCAGTCTGGGGCTGAGGTGAAGAAGCCTGGGGCCTCAG  
TGAAGGT  
CTCCTGCAAGGCTTCTGGATACACCTTCACCGGCTACTATATGCACTGGGTGCGACAGGCCCCCTGGACAAGGG  
CTTGAGT  
GGATGGGATGGATCAACCCTAACAGTGGTGGCACAACTATGCACAGAAGTTTCAGGGCTGGGTCACCATGAC  
CAGGGAC  
ACGTCCATCAGCACAGCCTACATGGAGCTGAGCAGGCTGAGATCTGACGACACGGCCGTGTATTACTGTGCGA  
GAGCTAG  
TAGAACTGAGAGTGTAAGGGATATATACTTTGACTACTGGGGCCAGGGAAC

>gi|247424945|gb|FJ488793.1| Homo sapiens isolate ADM-VH3-115  
immunoglobulin heavy chain variable region (IGHV3) gene, partial cds  
GAGGTGCAGCTGGTGGAGTCTGGAGGAGGCTTGATCCAGCCTGGGGGGTCCCTGAGACTCTCCTGTGCAGCCT  
CTGGGTT  
CACCGTCAGTAGCAACTACATGAGCTGGGTCCGCCAGGCTCCAGGGAAGGGGCTGGAGTGGGTCTCAGTTATT  
TATAGCG  
GTGGTAGCACATACTACGCAGACTCCGTGAAGGGCCGATTACCATCTCCAGAGACAATTCCAAGAACACGCT  
GTATCTT  
CAAATGAACAGCCTGAGAGCCGAGGACACGGCCGTGTATTACTGTGCGAGAAGTCGGTTCGGTTGGTTCGACC  
CCTGGGG  
CCAGGGAACCCTGGTCAACGTCTCCTCAGGGAGT  
>gi|39938326|gb|AY393531.1| Homo sapiens isolate RA129-M1-67.fa  
immunoglobulin heavy chain variable region mRNA, partial cds  
GTGCAGTCTGGGGCTGAGGTGAAGAAGCCTGGGGCCTCAGTGAAGGTTTCCTGCAAGGCTTCTGGATACACCT  
TCACTAG  
CTATGCTATGCATTGGGTGCGCCAGGCCCCGGACAAAGGCTTGAGTGGATGGGATGGATCAACGCTGGCAAT  
GGTAACA  
CAAAATATTACAGAAGTTCCAGGGCAGAGTCACCATTACCAGGGACACATCCGCGAGCACAGCCTACATGGA  
GCTGAGC  
AGCCTGAGATCTGAAGACACGGCTGTGTATTACTGTGCGAGAGAGTACGGTTCAAACCTACTACTACTACGGTA  
TGGACGT  
CTGGGGCCAAGGGACCACGGTCACCGTCTCCTCAGGGAGTGCATCCGCCCCAACCCCTTTTCCCCCTCGTCTCC  
TGTGAGA  
ATTCCTCCGTCGGATACGAGCAGCGTGGCCGTTGGCTGCCTCGCACAGGACTTCCTTCCCGACTCCATCACTTT  
CTCCTG  
>gi|74095346|emb|AJ889826.1| Homo sapiens partial IGHV gene for  
immunoglobulin heavy chain variable region, clone 2583310  
GAGGTGCAGCTGGTGGAGTCTGGGGGAGGCTTGGTACAGCCTGGGGGGTCCCTGAGACTCTCCTGTGCAGCCT  
CTGGATT  
CACCTTTAGCAGCTATGCCATGAGCTGGGTCCGCCAGGCTCCAGGGAAGGGGCTGGAGTGGGTCTCAGCTATT  
AGTGGTA  
GTGGTGGTAGCACATACTACGCAGACTCCGTGAAGGGCCGGTTCACCATCTCCAGAGACAATTCCAAGAACAC  
GCTGTAT  
CTGCAAATGAACAGCCTGAGAGCCGAGGACACGGCCGTATATTACTGTGCGAAAGATCTGGCGAGTATAGCAG  
CTCGTTT  
TGACTACTGGGGCCAGGGAACCCTGGTCAACGTCTCCTCAG  
>gi|112692149|emb|AM077872.1| Homo sapiens partial IGHV3-23\*01 gene for  
immunoglobulin heavy chain variable region, IGHV3-23\*01 allele, clone  
AS02A22  
GTGGCAGTTTCTGACCAGGGTTTCTTTTTGTTTGCAGGTGTCCAGTGTGAGGTGCAGCTGTTGGAGTCTGGGG  
GAGGCTT  
GGTACAGCCTGGGGGGTCCCTGAGACTCTCCTGTGCAGCCTCTGGATTACCTTTAGCAGCTATGCCATGAGC  
TGGGTCC  
GCCAGGCTCCAGGGAAGGGGCTGGAGTGGGTCTCAGCTATTAGTGGTAGTGGTGGTAGCACATACTACGCAGA  
CTCCGTG  
AAGGGCCGGTTCACCATCTCCAGAGACAATTCCAAGAACACGCTGTATCTGCAAATGAACAGCCTGAGAGCCG  
AGGACAC  
GGCCGTATATTACTGTGCGAAAAGTCTCGCGATTGTAGTAGTACCAGTTGCTATTTACTACTACGGTATGGAC  
GTCTGGG  
GCCAAGGGACCACGGTCACCGTCTCCTCAGGTAAGAATGGCCACTCTAGGGCTTTTGTT  
>gi|112691996|emb|AM077795.1| Homo sapiens partial IGHV3-23\*01 gene for  
immunoglobulin heavy chain variable region, IGHV3-23\*01 allele, clone  
CF01B03

TGAGTGTGAATGGATAAGAGTGAGAGAAACAGTGGATACGTGTGGCAGTTTCTGACCAGGGTTTCTTTTTGTT  
TGCAGGT  
GTCCAGTGTGAGGTGCAGCTGTTGGAGTCTGGGGGAGGCTTGGTACAGCCTGGGGGGTCCCTGAGACTCTCCT  
GTGCAGC  
CTCTGGATTACCTTTAGCAGCTATGCCATGAGCTGGGTCCGCCAGGCTCCAGGGAAGGGGCTGGAGTGGGTC  
TCAGCTA  
TTAGTGGTAGTGGTGGTAGCACATACTACGCAGACTCCGTGAAGGGCCGGTTCACCATCTCCAGAGACAATTC  
CAAGAAC  
ACGCTGTATCTGCAAATGAACAGCCTGAGAGCCGAGGACACGGCCGTATATTACTGTGCGAAAGATCTTCGGT  
ATCACTG  
GTCCGCAATATACGGTATGGACGTCTGGGGCCAAGGGACCACGGTCACCGTCTCCTCAGGTAAGAATGGCCAC  
TCTAGGG  
CCTTTGTT

>gi|112691525|emb|AM077559.1| Homo sapiens partial IGHV3-23\*01 gene for  
immunoglobulin heavy chain variable region, IGHV3-23\*01 allele, clone  
AC01D18

TGAGTGTGAATGGATAAGAGTGAGAGAAACAGTGGATACGTGTGGCAGTTTCTGACCAGGGTTTCTTTTTGTT  
TGCAGGT  
GTCCAGTGTGGGGTGCAGCTGTTGGAGTCTGGGGGAGGCTTGGTACAGCCTGGGGGGTCCCTGAGACTCTCCT  
GTGCAGC  
CTCTGGATTACCTTTAGCAGCTATGCCATGAGCTGGGTCCGCCAGGCTCCAGGGAAGGGGCTGGAGTGGGTC  
TCAGCTA  
TTAGTGGTAGTGGTGGTAGCACATACTACGCAGACTCCGTGAAGGGCCGGTTCACCATCTCCAGAGACAATTC  
CAAGAAC  
ACGCTGTATCTGCAAATGAACAGCCTGAGAGCCGAGGACACGGCCGTATATTACTGTGCGAAAGATTACTATG  
ATAGTAG  
TGGTTATTACTCTATCTGTCTGGGTGCTGGTTTCGACCCCTGGGGCCAGGGAACCCTGGTCACCGTCTCCTCA  
GGTGAGT  
CCTCACCACCCCTCTCTGAGTCCACTTAGGGAGACTCAGCTTGCCAGGGTCTCA

>gi|270053759|dbj|AB203735.1| Homo sapiens gene for immunoglobulin heavy  
chain variable region, partial cds, clone: CB11\_I-4A  
GTGCAGCTGGTGGAGTCTGGGGGAGGCTTGGTACAGCCTGGGGGGTCCCTGAGACTCTCCTGTGCAGCCTCTG  
GATTCAC  
CTTCAGTAGCTATAGCATGAACTGGGTCCGCCAGGCTCCAGGGAAGGGGCTGGAGTGGGTTTCATACATTAGT  
AGTAGTA  
GTAGTACCATATACTACGCAGACTCTGTGAAGGGCCGATTACCATCTCCAGAGACAATGCCAAGAACTCACT  
GTATCTG  
CAAATGAACAGCCTGAGAGCCGAGGACACGGCTGTGTATTACTGTGCGAGAGAGGGGATTTTGAATTGTAGTA  
GTACCAG  
CTGCTCAGATGCTTTTGATATCTGGGGCCA

>gi|219566190|dbj|AB363162.1| Homo sapiens IGH mRNA for immunoglobulin  
heavy chain, partial cds, clone: F021-385H  
GAGGTGCAGCTGGTGGAGTCTGGGGGAGGCTTGGTAAAGCCTGGGGGGTCCCTTAGACTCTCCTGTGCAGCCT  
CTGGATT  
CACTTTCAGTAACGCCTGGATGAGCTGGGTCCGCCAGGCTCCAGGGAAGGGGCTGGAGTGGGTTGGCCGTATT  
AAAAGCA  
AAACTGATGGTGGGACAACAGACTACGCTGCACCCGTGAAAGGCAGATTACCATCTCAAGAGATGATTCAAA  
AAACACG  
CTGTATCTGCAAATGAACAGCCTGAAAACCGAGGACACAGCCGTGTATTACTGTACCACAGAGTATAGTGGGA  
GCTATTT  
CTACTACTACGGTATGGACGTCTGGGGCCAAGGGACCACGGTCACCGTCTCGAGC

>gi|112691190|emb|AM077393.1| Homo sapiens partial IGHV3-23\*01 gene for  
immunoglobulin heavy chain variable region, IGHV3-23\*01 allele, clone  
CM07B17

AGTGTGAATGGATAAGAGTGAGAGAAACAGTGGATACGTGTGGCAGTTTCTGACCAGGGTTTCTTTTTGTTTG  
CAGGTGT  
CCAGTGTGAGGTGCAGCTGTTGGAGTCTGGGGGAGGCTTGGTACAGCCTGGGGGGTCCCTGAGACTCTCCTGT  
GCAGCCT  
CTGGATTACCTTTAGCAGCTATGCCATGAGCTGGGTCCGCCAGGCTCCAGGGAAGGGGCTGGAGTGGGTCTC  
AGCTATT  
AGTGGTAGTGGTGGTAGCACATACTACGCAGACTCCGTGAAGGGCCGGTTCACCATCTCCAGAGACAATTCCA  
AGAACAC  
GCTGTATCTGCAAATGAACAGCCTGAGAGCCGAGGACACGGCCGTATATTACTGTGCGAATCCGGCAGCGTAT  
GATTACG  
TTTGGGGGAGTTATACACACTGGGGCCAGGGAACCCTGGTCACCGTCTCCTCAGGTGAGTCCTCACAACCTCT  
CTCCTGC  
TTTAACTCTGAAGGGTTTTGCTGCATTTTTTGGGG  
>gi|15886975|emb|AJ414017.1| Homo sapiens partial mRNA for immunoglobulin  
heavy chain variable region (IGVH gene), isolate CLL031  
CAGGTGCAGCTGGTGCAGTCTGGGGCTGAGGTGAAGAAGCCTGGGTCTCGGTGAAGGTCTCCTGCAAGGCTT  
CTGGAGG  
CACCTTCAGCAGCTATGCTATCAGCTGGGTGCGACAGGCCCTGGACAAGGGCTTGAGTGGATGGGAGGGATC  
ATCCCTA  
TCTTTGGTACAGCAAACACTACGCACAGAAGTTCCAGGGCAGAGTCACGATTACCGCGGACGAATCCACGAGCAC  
AGCCTAC  
ATGGAGCTGAGCAGCCTGAGATCTGAGGACACGGCCGTGTATTACTGTGCGAGCCAATCTGATTTTTGGAGTG  
GTTATTC  
GAACCCAGGTTGGGGCCGGGTATATACTACTACTACTACGGTATGGACGTCTGGGGGCAAGGGACCACGGT  
>gi|54779922|gb|AY671268.1| Homo sapiens clone 505321+t7 immunoglobulin  
mu heavy chain mRNA, partial cds  
GTATGAAACACCTGTGGTTCTTCCTCCTGCTGGTGGCAGCTCCCAGATGGGTCTGTCCCAGGTGCAGCTACA  
GCAGTGG  
GGCGCAGGACTGTTGAAGCCTTCGGAGACCCTGTCCCTCACCTGCGCTGTCTATGGTGGGTCTTCAGTGGTT  
ACTACTG  
GAGCTGGATCCGCCAGCCCCCAGGGAAGGGGCTGGAGTGGATTGGGGAAATCAATCATAGTGGAAGCACCAAC  
TACAACC  
CGTCCCTCAAGAGTCGAGTCACCATATCAGTAGACACGTCCAAGAACCAGTTCTCCCTGAAGCTGAGCTCTGT  
GACCGCC  
GCGGACACGGCTGTGTATTACTGTGCGAGAGAGCCGGGTATGATTACGTTTGGGGGGGAGCTACTTTGACT  
ACTGGGG  
CCAGGGAACCCTGGTCACCGTCTCCTCAGGGAGTGCATCCGCCCCAACCCCTTTTCCCCCTCGTCTCCTGTGAG  
AATTCCC  
CGTC  
>gi|21668867|dbj|AB063833.1| Homo sapiens IGH mRNA for immunoglobulin  
heavy chain VHDJ region, partial cds, clone:H183  
GAGGTGCAGCTGGTGGAGTCTGGGGGAGGCGTGGTCCAGCCTGGGAGGTCCCTGAGACTCTCCTGTGCAGCCT  
CTGGATT  
CACCTTCAGTAGCTATGCTATGCACTGGGTCCGCCAGGCTCCAGGCAAGGGGCTGGAGTGGGTGGCAGTTATA  
TCATATG  
ATGGAAGTAATAAATACTACGCAGACTCCGTGAAGGGCCGATTCACCATCTCCAGAGACAATTCCAAGAACAC  
GCTGTAT  
CTGCAAATGAACAGCCTGAGAGCTGAGGACACGGCTGTGTATTACTGTGCGAGCGAGCTCCGTATAGCAGTGA  
AGGGTTA  
CTACTACTACTACGGTATGGACGTCTGGGGCCAAGGGACCACGGTCACCGTCTCGAGC  
>gi|5679489|emb|AJ389179.1| Homo sapiens partial mRNA for immunoglobulin  
heavy chain variable region (IGVH gene), sample GN12  
CAGGTGCAGCTGGTGCAGTCTGGGGCTGAGGTGAAGAAGCCTGGGTCTCGGTGAAGGTCTCCTGCAAGGCTT  
CTGGAGG

CACCTTCAGCAGCTATGCTATCAGCTGGGTGCGACAGGCCCTGGACAAGGGCTTGAGTGGATGGGAGGGATC  
ATCCCTA  
TCTTTGGTACAGCAAACCTACGCACAGAAGTTCCAGGGCAGAGTCACGATTACCGCGGACAAATCCACGAGCAC  
AGCCTAC  
ATGGAGCTGAGCAGCCTGAGATCTGAGGACACGGCCGTGTATTACTGTGCGGAGGGTATGGTTCAGGGAGTTA  
TTGGAAT  
TTACTACTACTACTACGGTATGGACGTCTGGGGCCAAGGGACCACGGTCACCGTCTCCTCAGGGAGTGCATCC  
GCC  
>gi|37671|emb|X62956.1| H.sapiens rearranged mRNA for fetal IG heavy  
chain Vh3, DM1 or Dq52 and Jh4 (clone FL13-15)  
GAGGTGCAGCTGTTGGAGTCTGGGGGAGGCTTGTTACAGCCTGGGGGGTCCCTGAGACTCTCCTGTGCAGCCT  
CTGGATT  
CACCTTTAGCAGCTATGCCATGAGCTGGGTCCGCCAGGCTCCAGGGAAGGGGCTGGAGTGGTCTCAGCTATT  
AGTGGTA  
GTGGTGGTAGCACATACTACGCAGACTCCGTGAAGGGCCGGTTCACCATCTCCAGAGACAATTCCAAGAACAC  
GCTGTAT  
CTGCAAATGAACAGCCTGAGAGCCGAGGACACGGCCGTATATTACTGTGCGAAAGATCGACGCCTAACTGGAA  
CTTTTGA  
CTACTGGGGCCAGGGAACCCTGGTCACCGTCTCCTCA  
>gi|402288387|gb|JX432488.1| Homo sapiens isolate Marc D2-VH1-69-10-rev-  
34\_2011-05-27\_001 immunoglobulin heavy chain variable region (IGHV) gene,  
partial sequence  
CAGGTGCAGCTGGTGCAGTCTGGGGCTGAGGTGAAGAAGCCTGGGTCTCGGTGAAGGTCTCCTGCAAGGCTT  
CTGGAGG  
CACCTTCAGCAGCTATGCTATCAGCTGGGTGCGACAGGCCCTGGACAAGGGCTTGAGTGGATGGGAGGGATC  
ATCCCTA  
TCTTTGGTACAGCAAACCTACGCACAGAAGTTCCAGGGCAGAGTCACGATTACCGCGGACGAATCCACGAGCAC  
AGCCTAC  
ATGGAGCTGAGCAGCCTGAGATCTGAGGACACGGCCGTGTATTACTGTGCGAGACCACGTCGGCCGATGATAG  
TAGTGGT  
TATTAAAGGTGATGATGCTTTTGATATCTGG  
>gi|270054978|dbj|AB204407.1| Homo sapiens gene for immunoglobulin heavy  
chain variable region, partial cds, clone: CB11\_IX-9F  
CTCTGTTCCAGGGAGTCCCTGTCTCAGGTGCAGCTGCAGGAGTCGGGCCAGGACTGGTGAAGCCTTCGGGGAC  
CCTGTCC  
CTCACCTGCGCTGTCTCTGGTGGCTCCATCAGCAGTAGTAACTGGTGGAGTTGGGTCCGCCAGCCCCCAGGGA  
AGGGGCT  
GGAGTGGATTGGGGAAATCTATCATAGTGGGAGCACCAACTACAACCCGTCCCTCAAGAGTCGAGTCACCATA  
TCAGTAG  
ACAAGTCCAAGAACCAGTTCTCCCTGAAGCTGAGCTCTGTGACCGCCGCGGACACGGCCGTGTATTACTGTGC  
GAGACAT  
CAGCTAATTACGATATTTTAGGGGACTTTGACTACTGGGGCCAGGGAGC  
>gi|112693977|emb|AM078786.1| Homo sapiens partial IGHV3-23\*01 gene for  
immunoglobulin heavy chain variable region, IGHV3-23\*01 allele, clone  
CE16A03  
GGATACGTGTGGCAGTTTCTGACCAGGGTTTCTTTTTGTTTGCAGGTGTCCAGTGTGAGGTGCAGCTGTTGGA  
GTCTGGG  
GGAGGCTTGGTACAGCCTGGGGGGTCCCTGAGACTCTCCTGTGCAGCCTCTGGATTACCTTTAGCAGCTATG  
CCATGAG  
CTGGGTCCGCCAGGCTCCAGGGAAGGGGCTGGAGTGGGTCTCAGCTATTAGTGGTAGTGGTGGTAGCACATAC  
TACGCAG  
ACTCCGTGAAGGGCCGGTTCACCATCTCCAGAGACAATTCCAAGAACACGCTGTATCTGCAAATGAACAGCCT  
GAGAGCC

GAGGACACGGCCGTATATTACTGTGCGAACCATTACGATATTTTGACTGGTTATTATTCGTATTACTACTACT  
ACTACGG  
TATGGACGTCTGGGGCCAAGGGACCACGGTCACCGTCTCCTCAGGTAAGAATGGCCACTCTAGGGCCTTTGTT  
>gi|46811527|gb|AY607414.1| Homo sapiens isolate CB#4/#186/8F  
nonfunctional non-productive immunoglobulin heavy chain CDR3, partial  
sequence  
ACTGGTGAAGCCTTCACAGACCCTGTCCCTCACCTGCACTGTCTCTGGTGGCTCCATCAGCAGTGGTAGTTAC  
TACTGGA  
GCTGGATCCGGCAGCCCCGCCGGAAGGGACTGGAGTGGATTGGGCGTATCTATAACCAGTGGGAGCACCAACTA  
CAACCCC  
TCCCTCAAGAGTCGAGTCACCATATCAGTAGACACGTCCAAGAACCAGTTCTCCCTGAAGCTGAGCTCTGTGA  
CCGCCGC  
AGACACGGCCGTGTATTACTGTGCGAGAGACCCATGATGGTAAGTCGGGGTGGTGGTAGCTGCTACTCAGGAT  
TGGACTA  
CTGGGGCCAGGGAACCCTGGTCACCGTCTCCTCA  
>gi|47846446|emb|AJ579134.1| Homo sapiens partial mRNA for IgM  
immunoglobulin heavy chain variable region (IGHV4-39 gene), clone T1.4.44  
CAGCTGCAGCTGCAGGAGTCGGGCCAGGACTGGTGAAGCCTTCGGAGACCCTGTCCCTCACCTGCACTGTCT  
CTGGTGG  
CTCCATCAGCAGTAGTAGTTACTACTGGGGCTGGATCCGCCAGCCCCAGGGAAGGGCTGGAGTGGATTGGG  
AGTATCT  
ATTATAGTGGGAGCACCTACTACAACCCGTCCCTCAAGAGTCGAGTCACCATATCCGTAGACACGTCCAAGAA  
CCAGTTC  
TCCCTGAAGCTGAGCTCTGTGACCGCCGAGACACGGCTGTGTATTACTGTGCGAGACATCCCGTGGATCCCT  
TAGAGAT  
GACGAACTTTGACTACTGGGGCCAGGGAACCCTGGTCACCGTCTCCTCA  
>gi|4995478|emb|AJ245010.1| Homo sapiens mRNA for immunoglobulin mu heavy  
chain variable region, partial, clone 1-E9  
CAGGTGCAGCTGCAGGAGTCGGGCCAGGACTGGTGAAGCCTTCACAGACCCTGTCCCTCACCTGCACTGTCT  
CTGGTGG  
CTCCATCAGCAGTGGTGGTTACTACTGGAGCTGGATCCGCCAGCACCCAGGGAAGGGCTGGAGTGGATTGGG  
TACATCT  
ATTACAGTGGGAGCACCTACTACAACCCGTCCCTCAAGAGTCGAGTTACCATATCAGTAGACACGTCTAAGAA  
CCAGTTC  
TCCCTGAAGCTGAGCTCTGTGACTGCCGCGGACACGGCCGTGTATTACTGTGCGAGAGATCGGGCATATTGTA  
GTAGTAC  
CAGCTGCTATGCGGAGGACTACTACTACGGTATGGACGTCTGGGGCCAAGGGACCACGGTCACCGTCTCCTCA  
>gi|112693489|emb|AM078543.1| Homo sapiens partial IGHV3-23\*01 gene for  
immunoglobulin heavy chain variable region, IGHV3-23\*01 allele, clone  
AQ05A02  
GGATACGTGTGGCAGTTTCTGACCAGGGTTTCTTTTTGTTTGCAGGTGTCCAGTGTGAGGTGCAGCTGTTGGA  
GTCTGGG  
GGAGGCTTGGTACAGCCTGGGGGGTCCCTGAGACTCTCCTGTGCAGCCTCTGGATTACCTTTAGCAGCTATG  
CCATGAG  
CTGGGTCCGCCAGGCTCCAGGGAAGGGGCTGGAGTGGGTCTCAGCTATTAGTGGTAGTGGTGGTAGCACATAC  
TACGCAG  
ACTCCGTGAAGGGCCGGTTCACCATCTCCAGAGACAATTCCAAGAACACGCTGTATCTGCAAATGAACAGCCT  
GAGAGCC  
GAGGACACGGCCGTATATTACTGTGCGAAAGGGGGGTATTGTAGTGGTGGTAGCTGCTACCAGAAATCTTATT  
ACTACTA  
CTACTACGGTATGGACGTCTGGGGCCAAGGGACCACGGTCACCGTCTCCTCAGGTAAGAATGGCCACTCTAGG  
GCCTTTG  
TT

>gi|46254204|gb|AY393137.1| Homo sapiens clone RA702-M1-5.fa  
immunoglobulin heavy chain mRNA, partial cds  
GTGCAGTCTGGGGCTGAGGTGAAGAAGCCTGGGTCTCGGTGAAGGTCTCCTGCAAGGCTTCTGGAGGCACCT  
TCAGCAG  
CTATGCTATCAGCTGGGTGCGACAGGCCCCCTGGACAAGGGCTTGAGTGGATGGGAGGGATCATCCCTATCTTT  
GGTACAG  
CAAACCTACGCACAGAAGTTCCAGGGCAGAGTCACGATTACCGCGGACGAATCCACGAGCACAGCCTACATGGA  
GCTGAGC  
AGCCTGAGATCTGAGGACACGGCCGTGTATTACTGTGCGAGGGCAATTCTTCTCTTGCTCGGCAGCCGGACC  
CTCGCTT  
TGACTACTGGGGCCAGGGAACCCTGGTCACCGTCTCCTCAGGGAGTGCATCCGCCCCAACCCCTTTTCCCCCTC  
GTCTCCT  
GTGAGAATTCCCCGTCGGATACGAGCAGCGTGGCCGTTGGCTGCCTCGCACAGGACTTCCTT  
>gi|112691185|emb|AM077390.1| Homo sapiens partial IGHV3-23\*01 gene for  
immunoglobulin heavy chain variable region, IGHV3-23\*01 allele, clone  
CE47A36  
TACGTGTGGCAGTTTCTGACCAGGGTTTCTTTTTGTTTGCAGGTGTCCAGTGTGAGGTGCAGCTGTTGGAGTC  
TGGGGGA  
GGCTTGGTACAGCCTGGGGGGTCCCTGAGACTCTCCTGTGCAGCCTCTGGATTACCTTTAGCAGCTATGCCA  
TGAGCTG  
GGTCCGCCAGGCTCCAGGGAAGGGGCTGGAGTGGGTCTCAGCTATTAGTGGTAGTGGTGGTAGCACATACTAC  
GCAGACT  
CCGTGAAGGGCCGGTTCACCATCTCCAGAGACAATTCCAAGAACACGCTGTATCTGCAAATGAACAGCCTGAG  
AGCCGAG  
GACACGGCCGTATATTACTGTGCGAAAACCCAAGGGCGACGTAGAGATGGCTACAAAGGTCAATTTGACTACT  
GGGGCCA  
GGGAACCCTGGTCACCGTCTCCTCAGGTGAGTCCTCACAACTCTCTCCTGCTTTAACTCTGAAGGGTTTTGC  
TGCATTT  
TTGGGG  
>gi|270054509|dbj|AB204152.1| Homo sapiens gene for immunoglobulin heavy  
chain variable region, partial cds, clone: CB11\_XI-2H  
CAGGTAAGGGGCTTCCTAGTCCTAAGGCTGAGGAAGGGATCCTGGTTTAGTTAAAGAGGATTTTATTACCCC  
TGTGTCC  
TCTCCACAGGTGTCCAGTCCCAGGTCCAGCTGGTGAATCTGGGGCTGAGGTGAAGAAGCCTGGGTCTCGGT  
GAAGGT  
TCCTGCAAGGCTTCTGGAGGCACCTTCAGCAGCTATACTATCAGCTGGGTGCGACAGGCCCCCTGGACAAGGGC  
TTGAGTG  
GATGGGAAGGATCATCCCTATCCTTGGTATAGCAAACCTACGCACAGAAGTTCCAGGGCAGAGTCACGATTACC  
GCGGACA  
AATCCACGAGCACAGCCTACATGGAGCTGAGCAGCCTGAGATCTGAGGACACGGCCGTGTATTACTGTGCGAG  
AGGGAGA  
TATTGTACTAATGGTGTATGCTACTGGTACTTCGATCTCTGGGGCCGTGGCAC  
>gi|270054908|dbj|AB204353.1| Homo sapiens gene for immunoglobulin heavy  
chain variable region, partial cds, clone: CB11\_IX-10E  
CTCTGTTACAGGGGTCCTGTCCCAGGTGCAGCTACAGCAGTGGGGCGCAGGACTGTTGAAGCCTTCGGAGAC  
CCTGTCC  
CTCACCTGCGCTGTCTATGGTGGGTCTTTCAGTGGTTACTACTGGAGCTGGATCCGCCAGCCCCCAGGGAAGG  
GGCTGGA  
GTGGATTGGGGAAATCAATCATAGTGGAAGCACCAACTACAACCCGTCCCTCAAGAGTCGAGTCACCATATCA  
GTAGACA  
CGTCCAAGAACCAGTTCTCCCTGAAGCTGAGCTCTGTGACCGCCGCGGACACGGCTGTGTATTACTGTGCGAA  
TATAGCA  
GCAGCTGGTTACTTTGACTACTGGGGCCAGGGAAC



>gi|112691883|emb|AM077738.1| Homo sapiens partial IGHV3-23\*01 gene for immunoglobulin heavy chain variable region, IGHV3-23\*01 allele, clone BD03C16  
TAAGAGTGAGAGAAACAGTGGATACGTGTGGCAGTTTCTGACCAGGGTTTCTTTTGTTCAGGTGTCCAGTGTGAGGT  
GCAGCTGTTGGAGTCTGGGGGAGGCTTGGTACAGCCTGGGGGGTCCCTGAGACTCTCCTGTGCAGCCTCTGGA  
TTCACCT  
TTAGCAGCTATGCCATGAGCTGGGTCCGCCAGGCTCCAGGGAAGGGGCTGGAGTGGGTCTCAGCTATTAGTGG  
TAGTGGT  
GGTAGCACATACTACGCAGACTCCGTGAAGGGCCGGTTACCATCTCCAGAGACAATTCCAAGAACACGCTGT  
ATCTGCA  
AATGAACAGCCTGAGAGCCGAGGACACGGCCGTATATTACTGTGCGAAAGATCTCCGGCCTATGGTTCGGGGA  
GTTATTA  
TAAGGGACTACGGTATGGACGTCTGGGGCCAAGGGACCACGGTCACCGTCTCCTCAGGTAAGAATGGCC  
>gi|122892315|gb|EF178070.1| Homo sapiens clone HVK1-9 immunoglobulin heavy chain variable region mRNA, partial cds  
ATGGCCCAGGTGCAGCTGGTGCAGTCTGGGGCTGAGGTGAAGAAGCCTGGGGCCTCAGTGAAGGTTTCCTGCA  
AGGCATC  
TGGATACACCTTACCAGCTACTATATGCACTGGGTGCGACAGGCCCTGGACAAGGGCTTGAGTGGATGGGA  
ATAATCA  
ACCCTAGTGGTGGTAGCACAAGCTACGCACAGAAGTTCCAGGGCAGAGTCACCATGACCAGGGACACGTCCAC  
GAGCACA  
GTCTACATGGAGCTGAGCAGCCTGAGATCTGAGGACACGGCCGTGTATTACTGTGCGAGAGATCCAAGGGGGG  
GCTATGG  
TTCTGGAGCCAATTACTACTACTACTACGGTATGGACGTCTGGGGCCAAGGGACCACGGTCACCGTCTCCTCA  
>gi|323431427|gb|HM995567.1| Homo sapiens isolate P2\_Inf\_2.3.6  
immunoglobulin variable region mRNA, partial cds  
GTGCAGCTGGTGGAGTCTGGGGGAGGCGTGGTCCAGCCTGGGAGGTCCCTGAGACTCTCCTGTGCAGCGTCTG  
GATTAC  
CTTCAGTAGCTATGGCATGCACTGGGTCCGCCAGGCTCCAGGCAAGGGGCTGGAGTGGGTGGCAGTTATATGG  
TATGATG  
GAAGTAATAAATACTATGCAGACTCCGTGAAGGGCCGATTACCATCTCCAGAGACAATTCCAAGAACACGCT  
GTATCTG  
CAAATGAACAGCCTGAGAGCCGAGGACACGGCTGTGTATTACTGTGCGAGAGATCAAAGCAGTGGCTGGTACT  
TTGACTA  
CTGGGGCCAGGGAACCCTGGTCACCGTCTCCTCAGGGAGTGCATCCGCCCCAACCCCTTTTCCCCTCGTCTCCT  
GTGAGAA  
TTCCCCGTCGGATACG  
>gi|46811517|gb|AY607409.1| Homo sapiens isolate CB#4/#187/2H  
immunoglobulin heavy chain CDR3 gene, partial cds  
CCTTCGGAGACCCTGTCCCTCACCTGCACTGTCTCTGGTGGCTCCATCAGCAGTAGTAGTTACTACTGGGGCT  
GGATCCG  
CCAGCCCCCAGGGAAGGGGCTGGAGTGGATTGGGAGTATCTATTATAGTGGGAGCACCTACTACAACCCGTCC  
CTCAAGA  
GTCGAGTCACCATATCCGTAGACACGTCCAAGAACCAGTTCTCCCTGAAGCTGAGCTCTGTGACCGCCGCAGA  
CACGGCT  
GTGTATTACTGTGCCCCCTGGGGATTACGATTTCTGGAGTGGTTATTACTCCCTACTACTACTACGGTATGG  
ACGTCTG  
GGGCCAAGGGACCACGGTCACCGTCTCCTCA  
>gi|371447646|gb|JN577566.1| Homo sapiens isolate RAR0701DT  
immunoglobulin G heavy chain variable region mRNA, partial cds  
GAGGTGCAGCTGGTGGAGTCTGGGGGAGGCTTGGTAAAGCCTGGGGGGTCCCTTAGACTCTCCTGTGCAGCCT  
CTGGATT

CACTTTCAGTAACGCCTGGATGAGCTGGGTCCGCCAGGCTCCAGGGAAGGGGCTGGAGTGGGTGGCCGTATT  
AAAAGCA  
AAACTGATGGTGGGACAACAGACTACGCTGCACCCGTGAAAGGCAGATTACCATCTCAAGAGATGATTCAAA  
AAACACG  
CTGTATCTGCAAATGAACAGCCTGAAAACCGAGGACACAGCCGTGTATTACTGTACCACAGAGGTGGATATAG  
TGGCTAC  
GGGGGGGCCGGTCTACTGGGGCCAGGGAACCCTGGTCAACGTCTCCTCA  
>gi|237701879|gb|FJ385291.1| Homo sapiens isolate RSV15H immunoglobulin  
heavy chain variable region mRNA, partial cds  
ATGGCCGAGGTGCAGCTGGTGGAGTCTGGGGGAGGCTTGGTACAGCCTGGGGGGTCCCTGAGACTCTCCTGTG  
CAGCCTC  
TGGATTACCTTTAGCAGCTATGCCATGAGCTGGGTCCGCCAGGCTCCAGGGAAGGGGCTGGAGTGGGTCTCA  
GCTATTA  
GTGGTAGTGGTGGTAGCACATACTACGCAGACTCCGTGAAGGGCCGGTTCACCATCTCCAGAGACAATTCCAA  
GAACACG  
CTGTATCTGCAAATGAACAGCCTGAGAGCCGAGGACACGGCCGTATATTACTGTGCGAAAGATGCCAGGTGGC  
TACAATT  
AGAATACTTCCAGCACTGGGGCCAGGGAACCCTGGTCAACGTCTCCTCAGCCGGTACCAAGGGCCC  
>gi|112691693|emb|AM077643.1| Homo sapiens partial IGHV3-23\*01 gene for  
immunoglobulin heavy chain variable region, IGHV3-23\*01 allele, clone  
BI01C94  
TGAGTGTGAATGGATAAGAGTGAGAGAAACAGTGGATACGTGTGGCAGTTTCTGACCAGGGTTTCTTTTTGTT  
TGCAGGT  
GTCCAGTGTGAGGTGCAGCTGTTGGAGTCTGGGGGAGGCTTGGTACAGCCTGGGGGGTCCCTGAGACTCTCCT  
GTGCAGC  
CTCTGGATTACCTTTAGCAGCTATGCCATGAGCTGGGTCCGCCAGGCTCCAGGGAAGGGGCTGGAGTGGGTC  
TCAGCTA  
TtagtGGTAGTGGTGGTAGCACATACTACGCAGACTCCGTGAAGGGCCGGTTCACCATCTCCAGAGACAATTC  
CAAGAAC  
ACGCTGTATCTGCAAATGAACAGCCTGAGAGCCGAGGACACGGCCGTATATTACTGTGCGAAAGATCTTTACA  
GTACCAG  
CTGCTATCTAAACCTCTGTCACTACTACTACGGTATGGACGTCTGGGGCCAAGGGACCACGGTCACCGTCTCC  
TCAGGTA  
AGAATGGCCACTCTAGGGCCTTTGTT  
>gi|158426869|gb|EU215355.1| Homo sapiens clone N-LCLB1-59 immunoglobulin  
heavy chain variable region (IGHV3) gene, partial cds  
TTGAGTGTGAATGGATAAGAGTGAGAGAAACAGTGGATACGTGTGGCAGTTTCTGACCAGGGTTTCTTTTTGT  
TTGCAGG  
TGTCCAGTGTGAGGTGCAGCTGTTGGAGTCTGGGGGAGGCTTGGTACAGCCTGGGGGGTCCCTGAGACTCTCC  
TGTGCAG  
CCTCTGGATTACCTTTAGCAGCTATGCCATGAGCTGGGTCCGCCAGGCTCCAGGGAAGGGGCTGGAGTGGGT  
CTCAGCT  
ATTAGTGGTAGTGGTGGTAGCACATACTACGCAGACTCCGTGAAGGGCCGGTTCACCATCTCCAGAGACAATT  
CCAAGAA  
CACGCTGTATCTGCAAATGAACAGCCTGAGAGCCGAGGACACGGCCGTATATTACTGTGCGAAAGCCCTTTTCG  
GATAGCA  
GCAGCTGGTACTACTTTGACTACTGG  
>gi|114386128|gb|DQ840794.1| Homo sapiens isolate D3-P-4-VH3-24  
immunoglobulin heavy chain variable region mRNA, partial cds  
CCCTTGGTGCAGCTGGTGGAGTCTGGGGGAGGCTTGGTCAAGCCTGGGGGGTCCCTGAGACTCTCCTGTGCAG  
CCTCTGG  
ATTCACCTTCAGTAGCTATAGCATGAACTGGGTCCGCCAGGCTCCAGGGAAGGGGCTGGAGTGGGTCTCATCC  
ATTAGTA

GTAGTAGTAGTTACATATACTACGCAGACTCAGTGAAGGGCCGATTACCATCTCCAGAGACAACGCCAAGAA  
CTCACTG  
TATCTGCAAATGAACAGCCTGAGAGCCGAGGACACGGCTGTGTATTACTGTGCGAGCGGGGTAGCAGCTGGTC  
TTGACTA  
CTGGGGCCAGGGAACCCCTGGTCACCGTCTCCTCA  
>gi|15886983|emb|AJ414021.1| Homo sapiens partial mRNA for immunoglobulin  
heavy chain variable region (IGHV gene), isolate CLL035  
CAGGTGCAGCTGGTGCAGTCTGGGGCTGAGGTGAAGAAGCCTGGGTCCTCGGTGAAGGTCTCCTGCAAGGCTT  
CTGGAGG  
CACCTTCAGCAGCTATGCTATCAGCTGGGTGCGACAGGCCCTGGACAAGGGCTTGAGTGGATGGGAGGGATC  
ATCCCTA  
TCTTTGGTACAGCAAACCTACGCACAGAAGTTCCAGGGCAGAGTCACGATTACCGCGGACGAATCCACGAGCAC  
AGCCTAC  
ATGGAGCTGAGCAGCCTGAGATCTGAGGACACGGCCGTGTATTACTGTGCGAGAGTCCCCCCTCCCGTAATA  
TTGTACT  
AATGGTGTATGATGATGCTTTTGATATCTGGGGCCAAGGGACAATGGTCACCGTC  
>gi|197115230|emb|FM206599.1| Homo sapiens partial IGHV4-34 gene for  
immunoglobulin heavy chain variable region, clone 79-20, individual Blood  
Donor 5  
CAGGTGCAGCTACAGCAGTGGGGCGCAGGACTGTTGAAGCCTTCGGAGACCCTGTCCCTCACCTGCGCTGTCT  
ATGGTGG  
GTCCTTCAGTGGTTACTACTGGAGCTGGATCCGCCAGCCCCAGGGAAGGGGCTGGAGTGGATTGGGGAAATC  
AATCATA  
GTGGAAGCACCAACTACAACCCGTCCCTCAAGAGTCGAGTCACCATATCAGTAGACACGTCCAAGAACCAGTT  
CTCCCTG  
AAGCTGAGCTCTGTGACCGCCGCGGACACGGCTGTGTATTACTGTGCGAGAGGTATTGTAGTAGTACCAGCTG  
CTATGTC  
TTATTACTACTACTACTACGGTATGGACGTCTGG  
>gi|1154847|emb|Z68387.1| H.sapiens rearranged IgM immunoglobulin heavy  
chain variable region 0515  
TTGGTACAGCCTGGGGGGTCCCTGAGACTCTCCTGTGCAGCCTCTGGATTACCTTTAGCAGCTATGCCATGA  
GCTGGGT  
CCGCCAGGCTCCAGGGAAGGGGCTGGAGTGGGTCTCAGCTATTAGTGGTAGTGGTGGTAGCACATACTACGCA  
GACTCCG  
TGAAGGGCCGGTTACCATCTCCAGAGACAATTCCAAGAACACGCTGTATCTGCAAATGAACAGCCTGAGAGC  
CGAGGAC  
ACGGCCGTATATTACTGTGCGAAAGATCACACTGCTTCTATAGCAGCAGCTGGTCCCGTGGGTGGGGTGACTT  
TTGATAT  
CTGGGGCCAAGGGACAATGGTCACCGTCTCTTCA  
>gi|54778979|gb|AY670760.1| Homo sapiens clone CBc3bmMK-e6 immunoglobulin  
mu heavy chain mRNA, partial cds  
GTCAGGTGCAGCTACAGCAGTGGGGCGCAGGACTGTTGAAGCCTTCGGAGACCCTGTCCCTCACCTGCGCTGT  
CTATGGT  
GGGTCCTTCAGTGGTTACTACTGGAGCTGGATCCGCCAGCCCCAGGGAAGGGGCTGGAGTGGATTGGGGAAA  
TCAATCA  
TAGTGGAAGCACCAACTACAACCCGTCCCTCAAGAGTCGAGTCACCATATCAGTAGACACGTCCAAGAACCAG  
TTCTCCC  
TGAAGCTGAGCTCTGTGACCGCCGCGGACACGGCTGTGTATTACTGTGCGAGAGCCTTAACCTCTCCCTAACTG  
GGGGAGG  
TACTACTTTGACTACTGGGGCCAGGGAACCCTGGTCACCGTCTCCTCAGGGAGTGCATCCGCCCCAACCCCTTT  
TCCCCCT  
CGTCTCCTGTGAGAATTCCCCGTCCGATACGAGCAGCGTGGCCGTTGGCTGCCTCGCACAGGACTTCCTTCCC  
GACTCCA  
TCACTTTCTCCTGGAAATACAAGAACAACCTCTGACATCAGCAGCACCCGGGGCTTCCCAT

>gi|112692509|emb|AM078052.1| Homo sapiens partial IGHV3-23\*01 gene for immunoglobulin heavy chain variable region, IGHV3-23\*01 allele, clone AG12A61

GACCAGGGTTTCTTTTTGTTTGCAGGTGTCCAGTGTGAGGTGCAGCTGTTGGAGTCTGGGGGAGGCTTGGTAC  
AGCCTGG  
GGGGTCCCTGAGACTCTCCTGTGCAGCCTCTGGATTACCTTTAGCAGCTATGCCATGAGCTGGGTCCGCCAG  
GCTCCAG  
GGAAGGGGCTGGAGTGGGTCTCAGCTATTAGTGGTAGTGGTGGTAGCACATACTACGCAGACTCCGTGAAGGG  
CCGGTTC  
ACCATCTCCAGAGACAATTCCAAGAACACGCTGTATCTGCAAATGAACAGCCTGAGAGCCGAGGACACGGCCG  
TATATTA  
CTGTGCGAAAGCAAGTGGCTGGAATACTACTACTACGGTATGGACGTCTGGGGCCAAGGGACCACGGTCACC  
GTCTCCT  
CAGGTAAGAATGGCCACTCTAGGGCCTTTGTT

>gi|70798429|gb|DQ100921.1| Homo sapiens isolate P437H immunoglobulin heavy chain variable region (IGHV4-39) mRNA, IGHV4-39\*01 allele, partial cds

GCAGCTGCAGGAGTCGGGCCCAGGACTGGTGAAGCCTTCGGAGACCCTGTCCCTCACCTGCACGTGTCTCTGGT  
GGCTCCA  
TCAGCAGTAGTAGTTACTACTGGGGCTGGATCCGCCAGCCCCAGGGAAGGGGCTGGAGTGGATTGGGAGTAT  
CTATTAT  
AGTGGGAGCACCTACTACAACCCGTCCCTCAAGAGTCGAGTCACCATATCCGTAGACACGTCCAAGAACCAGT  
TCTCCCT  
GAAGCTGAGCTCTGTGACCGCCGCAGACACGGCTGTGTATTACTGTGCGAGACATCGCCTCGGATATTGTAGT  
AGTACCA

GCTGCTACTACTACTACTACGGTATGGACGTCTGGGGCCAAGGGACCACGGTCACCGTCTCCTCA

>gi|54779836|gb|AY671223.1| Homo sapiens clone 101186+t7 immunoglobulin mu heavy chain mRNA, partial cds

GTGAGTCGGGCCCAGGACTGGTGAAGCCTTCGGAGACCCTGTCCCTCACCTGCACGTGTCTCTGGTGGCTCCGT  
CAGCAGT  
GGTAGTTACTACTGGAGCTGGATCCGGCAGCCCCAGGGAAGGGACTGGAGTGGATTGGGTATATCTATTACA  
GTGGGAG  
CACCAACTACAACCCCTCCCTCAAGAGTCGAGTCACCATATCAGTAGACACGTCCAAGAACCAGTTCTCCCTG  
AAGCTGA  
GCTCTGTGACCGCTGCGGACACGGCCGTGTATTACTGTGCGAGAGAAATCGCACCACTATCGGACTTTGACTA  
CTGGGGC  
CAGGGAACCCTGGTCACCGTCTCCTCAGGGAGTGCATCCGCCCCAACCCTTTTCCCCCTCGTCTCCTGTGAGA  
ATTCCCC  
GTCGGATACGAGCAGCGTGCCGTTGGCTGCCTCGCACAGGACTTCCTTCCCGACTCCATCACTTTCTTCTGGG  
AAATACA  
AAGAACACT

>gi|112691419|emb|AM077506.1| Homo sapiens partial IGHV3-23\*01 gene for immunoglobulin heavy chain variable region, IGHV3-23\*01 allele, clone CE09A17

GGATACGTGTGGCAGTTTCTGATCAGGGTTTCTTTTTGTTTGCAGGTGTCCAGTGTGAGGTGCAGCTGTTGGA  
GTCTGGG  
GGAGGCTTGGTACAGCCTGGGGGGTCCCTGAGACTCTCCTGTGCAGCCTCTGGATTACCTTTAGCAGCTATG  
CCATGAG  
CTGGGTCCGCCAGGCTCCAGGGAAGGGGCTGGAGTGGGTCTCAGCTATTAGTGGTAGTGGTGGTAGCACATAC  
TACGCAG  
ACTCCGTGAAGGGCCGGTTCACCATCTCCAGAGACAATTCCAAGAACACGCTGTATCTGCAAATGAACAGCCT  
GAGAGCC  
GAGGACACGGCCGTATATTACTGTGCGAAAGTACACTACCAACAGATAAAAGAGTATTACGATTTTTGGAGTG  
GTTATTA

TCCCGACTACTGGGGCCAGGGAACCCTGGTCACCGTCTCCTCAGGTGAGTCCTCACAACCTCTCTCCTGCTTT  
AACTCTG  
AAGGGTTTTGCTGCATTTTTGGGG  
>gi|112692593|emb|AM078094.1| Homo sapiens partial IGHV3-23\*01 gene for  
immunoglobulin heavy chain variable region, IGHV3-23\*01 allele, clone  
CM03A19  
GGATACGTGTGGCAGTTTCTGACCAGGGTTTCTTTTTGTTTGCAGGTGTCCAGTGTGAGGTGCAGCTGTTGGA  
GTCTGGG  
GGAGGCTTGGTACAGCCTGGGGGGTCCCTGAGACTCTCCTGTGCAGCCTCTGGATTACCTTTAGCAGCTATG  
CCATGAG  
CTGGGTCCGCCAGGCTCCAGGGAAGGGGCTGGAGTGGGTCTCAGCTATTAGTGGTAGTGGTGGTAGCACATAC  
TACGCAG  
ACTCCGTGAAGGGCCGGTTCACCATCTCCAGAGACAATTCCAAGAACACGCTGTATCTGCAAATGAACAGCCT  
GAGAGCC  
GAGGACACGGCCGTATATTACTGTGCGAAGACTACGGTGACCCCTTGGTACTACGGTATGGACGTCTGGGGCC  
AAGGGAC  
CACGGTCACCGTCTCCTCAGGTAAGAATGGCCACTCTAGGGCCTTTGTT  
>gi|1791104|gb|U80131.1|HSU80131 Human immunoglobulin heavy chain  
variable region (V4-31) gene, partial cds  
CAGGTGCAGCTGCAGGAGTCGGGCCAGGACTGGTGAAGCCTTCACAGACCCTGTCCCTCACCTGCACTGTCT  
CTGGTGG  
CTCCATCAGCAGTGGTGGTTACTACTGGAGCTGGATCCGCCAGCACCCAGGGAAGGGCCTGGAGTGGATTGGG  
TACATCT  
ATTACAGTGGGAGCACCTACTACAACCCGTCCCTCAAGAGTCGAGTTACCATATCAGTAGACACGTCTAAGAA  
CCAGTTC  
TCCCTGAAGCTGAGCTCTGTGACTGCCGCGGACACGGCCGTGTATTACTGTGCGAGAGGTGGGGAGTACGGTG  
ACGGCTA  
CTTTGACTACTGGGGCCAGGGAACCCTGGTCACCGTCTCCTCA  
>gi|114386222|gb|DQ840841.1| Homo sapiens isolate D2-P-4-VH3-30  
immunoglobulin heavy chain variable region mRNA, partial cds  
CCCTTGGTGCAGCTGGTGGAGTCTGGGGGAGGCTTGGTACAGCCTGGGGGGTCCCTGAGACTCTCCTGTGCAG  
CCTCTGG  
ATTCACCTTCAGTAGCTATAGCATGAACTGGGTCCGCCAGGCTCCAGGGAAGGGGCTGGAGTGGGTTTCATAC  
ATTAGTA  
GTAGTAGTAGTACCATATACTACGCAGACTCTGTGAAGGGCCGATTACCATCTCCAGAGACAATGCCAAGAA  
CTCACTG  
TATCTGCAAATGAACAGCCTGAGAGCCGAGGACACGGCTGTGTATTACTGTGCGAGAGATGGGGCCAGCAGCT  
GGCCCGT  
CGGCTACTGGGGCCAGGGAACCCTGGTCACCGTCTCCTCA  
>gi|185615|gb|L06023.1|HUMIGHVXZ Human antiplatelet immunoglobulin heavy  
chain (IGH@) variable region mRNA, partial cds  
GAGTCGGGCCAGGACTGGTGAAGCCTTCGAGACCCTGTCCCTCACCTGCACTGTCTCTGGTGGCTCCATCA  
GCAGTAG  
TAGTTACTACTGGGGCTGGATCCGCCAGCCCCAGGGAAGGGGCTGGAGTGGATTGGGAGTATCTATTATAGT  
GGGAGCA  
CCTACTACAACCCGTCCCTCAAGAGTCGAGTCACCATATCAGTAGACACGTCCAAGAACCAGTTCTCCCTGAA  
GCTGAGC  
TCTGTGACCGCCGCGGACACGGCCGTGTATTACTGTGCGAGATCTGCTGGCCTATATAGCAGCACGTACTACT  
ACTACTA  
CGGTATGGACGTCTGGGGCCAAGGGACCACGGTCACCGTCTCCTCA  
>gi|371447652|gb|JN577569.1| Homo sapiens isolate RAR0701EB  
immunoglobulin G heavy chain variable region mRNA, partial cds  
GAGGTGCAGCTGTTGGAGTCTGGGGGAGGCTTGGTACAGCCTGGGGGGTCCCTGAGACTCTCCTGTGCAGCCT  
CTGGATT

CACCTTTAGCAGCTATGCCATGAGCTGGGTCCGCCAGGCTCCAGGGAAGGGGCTGGAGTGGGTCTCAGCTATT  
AGTGGTA  
GTGGTGGTAGCACATACTACGCAGACTCCGTGAAGGGCCGGTTCACCATCTCCAGAGACAATTCCAAGAACAC  
GCTGTAT  
CTGCAAATGAACAGCCTGAGAGCCGAGGACACGGCCGTATATTACTGTGCGAAAGATCTAGATCCAGCCCCGT  
CCGGTGA  
CGACGGGGACTACTGGGGCCAGGGAACGCTGGTCACCGTCTCCTCA  
>gi|112692441|emb|AM078018.1| Homo sapiens partial IGHV3-23\*01 gene for  
immunoglobulin heavy chain variable region, IGHV3-23\*01 allele, clone  
BE02A30  
TGAGTGTGAATGGATAAGAGTGAGAGAAACAGTGGATACGTGTGGCAGTTTCTGACCAGGGTTTCTTTTTGTT  
TGCAGGT  
GTCCAGTGTGAGGTGCAGCTGTTGGAGTCTGGGGGAGGCTTGGTACAGCCTGGGGGGTCCCTGAGACTCTCCT  
GTGCAGC  
CTCTGGATTACCTTTAGCAGCTATGCCATGAGCTGGGTCCGCCAGGCTCCAGGGAAGGGGCTGGAGTGGGTC  
TCAGCTA  
TTAGTGGTAGTGGTGGTAGCACATACTACGCAGACTCCGTGAAGGGCCGGTTCACCATCTCCAGAGACAATTC  
CAAGAAC  
ACGCTGTATCTGCAAATGAACAGCCTGAGAGCCGAGGACACGGCCGTATATTACTGTGCGAAAGATCTCCATA  
GCAGGTT  
TTGGAGTGGTTATTATACCGGTCACTACTACTACGGTATGGACGTCTGGGGCCAAGGGACCACGGTCACCGTC  
TCCTCAG  
GTAAGAATGGCCACTCTAGGGCCTTTGTT  
>gi|4100371|gb|U97245.1|HSU97245 Homo sapiens IgM heavy chain variable  
region (humha327) mRNA, partial cds  
GAGGTGCAGCTGGTGGAGTCTGGGGGAGGCTTGGTAAAGCCTGGGGGGTCCCTTAGACTCTCCTGTGCAGCCT  
CTGGATT  
CACTTTCAGTAACGCCTGGATGAGCTGGGTCCGCCAGGCTCCAGGGAAGGGGCTGGAGTGGGTTGGCCGTATT  
AAAAGCA  
AAACTGATGGTGGGACAACAGACTACGCTGCACCCGTGAAAGGCAGATTCACCATCTCAAGAGATGATTCAAA  
AAACACG  
CTGTATCTGCAAATGAACAGCCTGAAAACCGAGGACACAGCCGTGTATTACTGTACCACAGACTATAGTGGTT  
ATTACCC  
TTGGTACTTTGACTACTGGGGCCAGGGAACCCTGGTCAACCGTCTCCTCAGGGAGTGCATCCGCCCCAACCCCTT  
TTCCCCC  
TCGTCTGGATCCGG  
>gi|54779794|gb|AY671199.1| Homo sapiens clone 101126+t7 immunoglobulin  
mu heavy chain mRNA, partial cds  
GTTGAAACACCTGTGGTTCTTCCTCCTCCTGGTGGCAGCTCCCAGATGGGTCTGTCCCAGGTGCAGCTACAG  
CAGTGGG  
GCGCAGGACTGTTGAAGCCTTCGGAGACCCTGTCCCTCACCTGCGCTGTCTATGGTGGGTCCTTCAGTGGTTA  
CTACTGG  
AGCTGGATCCGCCAGCCCCCAGGGAAGGGGCTGGAGTGGATTGGGGAAATCAATCATAGTGGAAGCACCAACT  
ACAACCC  
GTCCCTCAAGAGTCGAGTCACCATATCAGTAGACACGTCCAAGAACCAGTTCTCCCTGAAGCTGAGCTCTGTG  
ACGCCG  
CGGACACGGCTGTGTATTACTGTGCGAGTAGGGATATAGTGGCTACGATTCTGGGCTGACTACTGGGGCCAGGG  
AACCCAG  
GTCACCGTCTCCTCAGGGAGTGCATCCGCCCCAACCCCTTTTCCCCCTCGTCTCCTGTGAGAATTCCCCGTGCG  
ATACGAG  
>gi|54780305|gb|AY671476.1| Homo sapiens clone 2d414 immunoglobulin mu  
heavy chain mRNA, partial cds  
GTCAGGTGCAGCTGCAGGAGTCGGGCCCAGGACTGGTGAAGCCTTCGGAGACCCTGTCCCTCACCTGCACTGT  
CTCTGGT

GGCTCCATCAGTAGTTACTACTGGAGCTGGATCCGGCAGCCCCAGGGAAGGGACTGGAGTGGATTGGGTATA  
TCTATTA  
CAGTGGGAGCACCAACTACAACCCCTCCCTCAAGAGTCGAGTCACCATATCAGTAGACACGTCCAAGAACCAG  
TTCTCCC  
TGAAGCTGAGCTCTGTGACCGCTGCGGACACGGCCGTGTATTACTGTGCGAGAGATTTCCCGTGGCTACGAGA  
TGATGCT  
TTTGATATCTGGGGCCAAGGGACAATGGTCACCGTCTCTTCAGGGAGTGCATCCGCCCCAACCCCTTTTCCCC  
TCGTCTC  
CTGTGAGAATTCCCCGTGG  
>gi|112692922|emb|AM078258.1| Homo sapiens partial IGHV3-23\*01 gene for  
immunoglobulin heavy chain variable region, IGHV3-23\*01 allele, clone  
AG13A49  
TGGATACGTGTGGCAGTTTCTGACCAGGGTTTCTTTTTGTTTGCAGGTGTCCAGTGTGAGGTGCAGCTGTTGG  
AGTCTGG  
GGGAGGCTTGGTACAGCCTGGGGGGTCCCTGAGACTCTCCTGTGCAGCCTCTGGATTACCTTTAGCAGCTAT  
GCCATGA  
GCTGGGTCCGCCAGGCTCCAGGGAAGGGGCTGGAGTGGTCTCAGCTATTAGTGGTAGTGGTGGTAGCACATA  
CTACGCA  
GACTCCGTGAAGGGCCGGTTCACCATCTCCAGAGACAATTCCAAGAACACGCTGTATCTGCAAATGAACAGCC  
TGAGAGC  
CGAGGACACGGCCGTATATTACTGTGCGAAAGATCCCTCTGACTACGGTGACTACTGGGTTGCGGGCGGTATG  
GACGTCT  
GGGGCCAAGGGACCACGGTCACCGTCTCCTCAGGTAAGAATGGCCACTCTAGGGCCTTTGTT

>gi|2344953|gb|U84180.1|HSU84180 Homo sapiens isolate LID IgM heavy chain  
VH1 region precursor (VH1-69) gene, partial cds  
ATGGACTGGACCTGGAGGTTCTCTTTGTGGTGGCAGCAGCTACAGGTAAGGGGCTTCCTAGTCCTAAGG  
CTGAGGAAGGGATCCTGGTTTAGTTAAAGAGGATTTTATTACCCCTGTGTCTCTCCACAGGTGTCCAG  
TCCCAGGTGCAGCTGGTGCAGTCTGGGGCTGAGGTGAAGAAGCCTGGGTCTCGGTGAAGGTCTCCTGCA  
AGGCTTCTGGAGGCACCTTCAGCAGCTATGCTATCAGCTGGGTGCGACAGGCCCCCTGGACAAGGGCTTGA  
GTGGATGGGAAGGATCATCCCTATCCTTGGTATAGCAAACTACGCACAGAAGTTCCAGGGCAGAGTCACG  
ATTACCGCGACAAATCCACGAGCACAGCCTACATGGAGCTGAGCAGCCTGAGATCTGAGGACACGGCCG  
TGTATTACTGTGCGAGCAATCCTGTTACGATTTTTGGAGTGGTTATTAACAAACTGGTTCGACCCCTG  
GGGCCAGGGAACCCTGGTCACTGTCTCCTCA  
>gi|112692900|emb|AM078247.1| Homo sapiens partial IGHV3-23\*01 gene for  
immunoglobulin heavy chain variable region, IGHV3-23\*01 allele, clone  
CE14A10  
GTTTGCAGGTGTCCAGTGTGAGGTGCAGCTGTTGGAGTCTGGGGGAGGCTTGGTACAGCCTGGGGGGTCC  
CTGAGACTCTCCTGTGCAGCCTCTGGATTACCTTTAGCAGCTATGCCATGAGCTGGGTCCGCCAGGCTC  
CAGGGAAGGGGCTGGAGTGGGTCTCAGCTATTAGTGGTAGTGGTGGTAGCACATACTACGCAGACTCCGT  
GAAGGGCCGGTTCACCATCTCCAGAGACAATTCCAAGAACACGCTGTATCTGCAAATGAACAGCCTGAGA  
GCCGAGGACACGGCCGTATATTACTGTGCACTACTGCAGGGCAGCAGCTGGTACGACTACTACTACTACG  
GTATGGACGTCTGGGGCCAAGGGACCACGGTCACCGTCTCCTCAGGTAAGAATGGCCACTCTAGGGCCTT  
TGTT

>gi|602005|emb|Z46327.1| H.sapiens immunoglobulin heavy chain VDJ region  
(SEBV B53)  
CTACAGCAGTGGGGCGCAGGACTGTTGAAGCCTTCGGAGACCCTGTCCCTCACCTGCGCTGTCTATGGTGGGT  
CCTTCAG  
TGGTTACTACTGGAGCTGGATCCGCCAGCCCCAGGGAAGGGGCTGGAGTGGATTGGGGAAATCAATCATAGT  
GGAAGCA  
CCAATAACAACCCGTCCCTCAAGAGTCGAGTCACCATATCAGTAGACACGTCCAAGAACCAGTTCTCCCTGAA  
GCTGAGC  
TCTGTGACCGCCGCGGACACGGCTGTGTATTACTGTGCGAGAACCTACCTTATAGCAGCTCGTCCCTATCGCC  
TCTATTC

CGCCAAAACTGGTTTCGACCCCTGGGGCCAGGGAACCCTGGTCACCGTCTCCTCA  
>gi|158714290|gb|EU099078.1| Homo sapiens isolate MC30 immunoglobulin  
heavy chain variable region (IGHV) mRNA, partial cds  
AGACTCTCCTGTACAGCTTCTGGATTACCTTTGGTGATTATGCTATGAGCTGGTTCCGCCAGGCTCCAGGGA  
AGGGGCT  
GGAGTGGGTAGGTTTCATTAGAAAGCAAAGCTTATGGTGGGACAACAGAATACGCCGCGTCTGTGAAAGGCAGA  
TTCACCA  
TCTCAAGAGATGATTCCAAAAGCATCGCCTATCTGCAAATGAACAGCCTGAAAACCGAGGACACAGCCGTGTA  
TTACTGT  
ACTAGAGCCCAATTGATACTAGTAGTACCAGCTGCCAGCTGGGACTACTTTGACTACTGGGGCCAGGGAACCC  
TGGTCAC  
CGTCTCCTCAGGGAGTGCATCCGCCCCAACCCTTTTCCCCCTCGTCTCCTGTGAGAATTCCCCGTCGGGATAC  
GAGCAGC  
GGGCCGTGGGCTGCTCGCACAGAATTCT  
>gi|112693417|emb|AM078507.1| Homo sapiens partial IGHV3-23\*01 gene for  
immunoglobulin heavy chain variable region, IGHV3-23\*01 allele, clone  
AO04A17  
GTGTGGCAGTTTCTGACCAGGGTTTCTTTTTGTTTGCAGGTGTCCAGTGTGAGGTGCAGCTGTTGGAGTCTGG  
GGGAGGC  
TTGGTACAGCCTGGGGGGTCCCTGAGACTCTCCTGTGCAGCCTCTGGATTACCTTTAGCAGCTATGCCATGA  
GCTGGGT  
CCGCCAGGCTCCAGGGAAGGGGCTGGAGTGGGTCTCAGCTATTAGTGGTAGTGGTGGTAGCACATACTACGCA  
GACTCCG  
TGAAGGGCCGGTTCACCATCTCCAGAGACAATTCCAAGAACACGCTGTATCTGCAAATGAACAGCCTGAGAGC  
CGAGGAC  
ACGGCCGTATATTACTGTGCGAAGGGCTCCAGTGGCTGGTACCGGGATTTTGGGACCTCAGGTGATACGGTA  
TGGACGT  
CTGGGGCCAAGGGACCACGGTCACCGTCTCCTCAGGTAAGAATGGCCACTCTAGGGCCTTTGTT  
>gi|106897154|gb|DQ535294.1| Homo sapiens clone HB1-57 circulating B cell  
antibody heavy chain variable region mRNA, partial cds  
ATGGCCCAGGTGCAGCTACAACAGTGGGGCGCAGGACTGTTGAAGCCTTCGGAGACCCTGTCCCTCACCTGCG  
CTGTCTA  
TGGTGGGTCTTTCAGTGGTTACTACTGGAGCTGGATCCGCCAGCCCCCAGGGAAGGGGCTGGAGTGGATTGGG  
GAAATCA  
ATCATAGTGGAAGCACCAACTACAACCCGTCCCTCAAGAGTCGAGTCACCATATCAGTAGACACGTCCAAGAA  
CCAGTTC  
TCCCTGAAGCTGAGCTCTGTGACCGCCGCGGACACGGCTGTGTATTACTGTGCGAGGTTTCGGGGCGGATGGTT  
CGGGGAG  
TTATTATAGTGACCGGGCTCTTGACTACTGGGGCCAGGGAACCCTGGTCACCGTCTCCTCA
